# Structures of the human cholecystinin receptors in complex with agonists and antagonists

Xuefeng Zhang<sup>1,2,11</sup>, Chenglin He<sup>3,11</sup>, Mu Wang<sup>1,2,4,11</sup>, Qingtong Zhou<sup>5,6,11</sup>, Dehua Yang<sup>1,2,7,11</sup>,  
Ya Zhu<sup>1,11</sup>, Wenbo Feng<sup>3</sup>, Hui Zhang<sup>1,2</sup>, Antao Dai<sup>7</sup>, Xiaojing Chu<sup>1</sup>, Jia Wang<sup>7</sup>, Zhenlin Yang<sup>1</sup>,  
Yi Jiang<sup>1</sup>, Ulrich Sensfuss<sup>8</sup>, Qiuxiang Tan<sup>1</sup>, Shuo Han<sup>1</sup>, Steffen Reedtz-Runge<sup>8</sup>, Eric H. Xu<sup>1,2</sup>,  
Suwen Zhao<sup>4,5\*</sup>, Ming-Wei Wang<sup>1,2,3,4,6,7\*</sup>, Beili Wu<sup>1,2,4,9\*</sup>, Qiang Zhao<sup>1,2,9,10\*</sup>

<sup>1</sup>State Key Laboratory of Drug Research and CAS Key Laboratory of Receptor Research, Shanghai Institute of Materia Medica, Chinese Academy of Sciences, Shanghai 201203, China

<sup>2</sup>University of Chinese Academy of Sciences, Beijing 100049, China

<sup>3</sup>School of Pharmacy, Fudan University, Shanghai 201203, China

<sup>4</sup>School of Life Science and Technology, ShanghaiTech University, Shanghai 201210, China

<sup>5</sup>iHuman Institute, ShanghaiTech University, Shanghai 201210, China

<sup>6</sup>School of Basic Medical Sciences, Fudan University, Shanghai 200032, China

<sup>7</sup>The National Center for Drug Screening, Shanghai Institute of Materia Medica, Chinese Academy of Sciences, 201203 Shanghai, China

<sup>8</sup>Novo Nordisk A/S, Novo Nordisk Park, Måløv 2760, Denmark

<sup>9</sup>School of Pharmaceutical Science and Technology, Hangzhou Institute for Advanced Study, University of Chinese Academy of Sciences, Hangzhou 310024, China

<sup>10</sup>Zhongshan Institute for Drug Discovery, the Institutes of Drug Discovery and Development, CAS, Guangdong 528400, China

<sup>11</sup>These authors contributed equally: Xuefeng Zhang, Chenglin He, Mu Wang, Qingtong Zhou, Dehua Yang, Ya Zhu

\*e-mail: zhaosw@shanghaitech.edu.cn; mwwang@simm.ac.cn; beiliwu@simm.ac.cn; zhaoq@simm.ac.cn

26 **Summary**

27 **Cholecystokinin receptors, CCK<sub>A</sub>R and CCK<sub>B</sub>R, are important neuro-intestinal peptide**  
28 **hormone receptors and play a vital role in food intake and appetite regulation. Here we**  
29 **report three crystal structures of the human CCK<sub>A</sub>R in complex with different ligands,**  
30 **including one peptide agonist and two small-molecule antagonists, as well as two cryo-**  
31 **electron microscopy structures of CCK<sub>B</sub>R–gastrin in complex with G<sub>i2</sub> and G<sub>q</sub>,**  
32 **respectively. These structures reveal the recognition pattern of different ligand types and**  
33 **the molecular basis of peptide selectivity in the cholecystokinin receptor family. By**  
34 **comparing receptor structures in different conformational states, a stepwise activation**  
35 **process of cholecystokinin receptors is proposed. Combined with pharmacological data,**  
36 **our results provide atomic details for differential ligand recognition and receptor**  
37 **activation mechanisms. These insights will facilitate the discovery of potential**  
38 **therapeutics targeting cholecystokinin receptors.**

39 Biologically active peptides often present in families whose members display sequence and  
40 structural similarity. Cholecystokinin (CCK) and gastrin, however, are the only two members  
41 of the dityrosyl-sulfated peptide family that exists in mammals and share the same carboxyl-  
42 terminal octapeptide-amide<sup>1,2</sup>. They are the most abundant peptides in the gastrointestinal tract  
43 and the central nervous system acting as physiologically important hormones and  
44 neurotransmitters. Among CCK and gastrin peptides of different lengths, CCK-8 and gastrin-  
45 17 are the major forms with full biological activity<sup>3-5</sup>. Cholecystokinin A and cholecystokinin  
46 B receptors (CCK<sub>A</sub>R and CCK<sub>B</sub>R) are the two homologous G protein-coupled receptors  
47 (GPCRs) for CCK and gastrin, respectively<sup>6,7</sup>. CCK<sub>A</sub>R preferentially binds to sulfated CCK,  
48 while CCK<sub>B</sub>R recognizes both CCK and gastrin with similar affinities and discriminate poorly  
49 between sulfated and non-sulfated forms of CCK and gastrin<sup>7-9</sup>. Previous studies demonstrated  
50 that gastrin could activate pertussis toxin-sensitive or phospholipase C-dependent downstream

51 effectors, indicating both  $G_{i/o}$  and  $G_{q/11}$  signaling are involved in  $CCK_{BR}$  functionality<sup>10, 11</sup>.  
52 When activated, these two receptors engage in fundamental physiological actions such as  
53 satiety regulation, pancreatic enzyme secretion and gall bladder contraction<sup>6, 12</sup>. They are also  
54 implicated in behavioral processes including anxiety, memory and drug addiction<sup>13, 14</sup>.

55 In line with the important roles of CCKRs, their ligands have shown therapeutic potential  
56 for anxiety, obesity and type 2 diabetes<sup>15, 16</sup>. Highly selective non-peptidic antagonists of  
57  $CCK_{AR}$  such as devazepide [3S(-)-N(2,3-Dihydro-1-methyl-2-oxo-5-phenyl-1H-1,4-  
58 benzodiazepine-3-yl)-1H-indole-2-carboxamide] and lantitript [1-([2-(4-(2-Chlorophenyl)  
59 thiazole-2-yl)aminocarbonyl]indolyl) acetic acid] (Extended Data Fig. 1) were developed to  
60 treat gastrointestinal disorders, neuropathic pain and pancreatic cancer<sup>17, 18</sup>, while highly  
61 selective  $CCK_{AR}$  agonists such as NN9056, a modified CCK-8 with high selectivity and long-  
62 acting properties, have been proposed as potential treatment for obesity<sup>19, 20</sup>. Meanwhile,  
63 antagonists such as Z-360 or JB95008 and agonists such as ceruletide targeting  $CCK_{BR}$  have  
64 been implicated in treating diabetes, anxiety and thyroid cancer, etc<sup>21, 22</sup>. In addition,  
65 antagonists of CCKRs, such as devazepide for  $CCK_{AR}$  or L365,260 for  $CCK_{BR}$ , has exhibit  
66 the significant attenuation in drug or stress induced relapse to cocaine seeking in animal model,  
67 showing potential in treating drug abuse<sup>23</sup>. However, many clinical trials targeting  $CCK_{AR}$  or  
68  $CCK_{BR}$  were terminated at different phases due to low efficacy or poor bioavailability in  
69 patients, suggesting that a better understanding of the CCKR family is required. To provide  
70 molecular details of ligand recognition and receptor activation of CCKRs, we solved the crystal  
71 structures of the human  $CCK_{AR}$  in complex with two small-molecule antagonists (lantitript and  
72 devazepide) and one full agonist NN9056, as well as two cryo-electron microscopy (cryo-EM)  
73 structures of  $CCK_{BR}$  in complex with gastrin coupled to  $G_i$  and  $G_q$ , respectively.

#### 74 **Overall structures of CCKR complexes**

75 To improve protein stability and facilitate crystallization, residues K241–S301 in the third  
76 intracellular loop (ICL3) of CCK<sub>A</sub>R were replaced with a T4 lysozyme fusion protein and 22  
77 residues at the receptor C terminus were truncated. Additionally, a mutation F130<sup>3,41</sup>W  
78 (superscript indicates nomenclature according to Ballesteros-Weinstein numbering system<sup>24</sup>)  
79 was introduced to further improve protein homogeneity. Using the optimized CCK<sub>A</sub>R, the  
80 CCK<sub>A</sub>R–NN9056 complex structure was determined at 3.0 Å resolution (Extended Data Table  
81 1). To solve the structure of CCK<sub>A</sub>R bound to the antagonists, another mutation D87<sup>2,50</sup>N was  
82 introduced to stabilize the receptor in an inactive state<sup>25</sup>, and the complex structures of  
83 CCK<sub>A</sub>R–devazepide and CCK<sub>A</sub>R–linitript were determined at 2.5 Å and 2.8 Å resolution,  
84 respectively (Extended Data Fig. 2, Extended Data Table 1).

85 The CCK<sub>A</sub>R structures adopt a canonical seven-transmembrane helical bundle structure  
86 (helices I–VII) of GPCRs (Fig. 1a–d), with the second extracellular loop (ECL2) of CCK<sub>A</sub>R  
87 forming a β-hairpin structure that is similar to the previously determined structures of peptide  
88 receptors<sup>26–28</sup>. The third extracellular loop (ECL3) adopts a two-turn α-helical conformation  
89 which has never been observed before in other class A GPCR structures. The complexes of  
90 CCK<sub>A</sub>R–devazepide and CCK<sub>A</sub>R–linitript are structurally similar with an overall Cα root-  
91 mean-square deviation (RMSD) of 0.33 Å (Fig. 1g, h). Compared to the CCK<sub>A</sub>R–linitript  
92 structure, the CCK<sub>A</sub>R–NN9056 structure showed a larger variance (overall Cα RMSD, 0.48 Å)  
93 with main differences appearing in the ligand binding region of helix VI. Upon binding to the  
94 agonist NN9056, ~1 Å inward shift of helix VI in the ligand binding region was observed and  
95 such a conformational change might be required for receptor activation. Except for helix VI,  
96 the differences in the transmembrane domain between agonist- and antagonist-bound CCK<sub>A</sub>R  
97 are relatively small.

98 It was reported that CCK<sub>B</sub>R could activate both G<sub>i</sub> and G<sub>q</sub> signaling pathways, and indeed,  
99 CCK<sub>B</sub>R was co-purified with these two G proteins while failed to form protein complex with

100 G<sub>s</sub>. The CCK<sub>B</sub>R–G<sub>q</sub> and CCK<sub>B</sub>R–G<sub>i2</sub> complexes were assembled in the presence of the CCK<sub>B</sub>R  
101 selective endogenous peptide gastrin-17 and their structures were determined by single-particle  
102 cryo-EM analysis with the overall resolution of 3.1 Å and 3.3 Å (Fig. 1e, f, Extended Data Fig.  
103 3, Extended Data Table 2), respectively. Compared to the inactive CCK<sub>A</sub>R structure, the  
104 G<sub>q</sub>/G<sub>i2</sub>-coupled CCK<sub>B</sub>R structures exhibit key structural features of active class A GPCRs,  
105 including a large outward movement of the intracellular tip of helix VI and a small inward shift  
106 at the intracellular end of helix VII. However, the conformational changes in CCK<sub>B</sub>R are  
107 relatively small with an approximately 6 Å movement for helix VI compared to other active  
108 structures of class A GPCR–G-protein complexes<sup>29-31</sup>.

109 These two G protein-coupled CCK<sub>B</sub>R complexes are structurally similar with an overall  
110 C $\alpha$  RMSD of 0.9 Å. However, despite the overall similarity, several distinct features have been  
111 observed in the recognition patterns for G<sub>i2</sub> and G<sub>q</sub>. Both G<sub>i2</sub> and G<sub>q</sub> insert in the same binding  
112 pocket formed by helices II, III, VI and VII as well as the intracellular loops, however, a ~8°  
113 rotation between the G<sub>i2</sub> and G<sub>q</sub> heterotrimeric proteins was noted, as described in the  
114 companion CCK<sub>A</sub>R paper (Extended Data Fig. 4). Comparison of the structures of CCK<sub>B</sub>R–  
115 G<sub>i2</sub> and CCK<sub>B</sub>R–G<sub>q</sub> complexes revealed differences in the intracellular loops and  
116 transmembrane domain of CCK<sub>B</sub>R as well as the  $\alpha$ N helix and C-terminal  $\alpha$ 5 helix of G protein.  
117 The distance between the receptor ICL2 and the  $\alpha$ N helix of the CCK<sub>B</sub>R–G<sub>q</sub> complex is closer  
118 than that in the CCK<sub>B</sub>R–G<sub>i2</sub> complex, resulting in more extensive interactions between ICL2  
119 of CCK<sub>B</sub>R and the  $\alpha$ N helix of G<sub>q</sub>. R163<sup>ICL2</sup> and V164<sup>ICL2</sup> in CCK<sub>B</sub>R form several hydrophobic  
120 interactions with the  $\alpha$ N helix of G<sub>q</sub> while only V164<sup>ICL2</sup> forms hydrophobic interaction with  
121 that of G<sub>i2</sub>. In addition, Q166<sup>ICL2</sup> and T167<sup>ICL2</sup> form several hydrogen bonds with G<sub>q</sub> while only  
122 one hydrogen bond is formed between ICL2 of CCK<sub>B</sub>R and G<sub>i2</sub>.

123 Since the two G protein-coupled CCK<sub>B</sub>R complexes are highly resemble to each other, the  
124 CCK<sub>B</sub>R–G<sub>i2</sub> complex was used to compare with the corresponding complex structure of

125 CCK<sub>A</sub>R and these structures are very similar with an overall C $\alpha$  RMSD of 0.9 Å. The CCK<sub>A</sub>R  
126 and CCK<sub>B</sub>R complexes showed a common activation pattern with W<sup>6.48</sup> and the PIF motif  
127 exhibiting similar conformations upon activation. The G<sub>i2</sub> binds to CCK<sub>A</sub>R and CCK<sub>B</sub>R in a  
128 similar binding pocket formed by helices II, III and V-VIII. The outward movement of the  
129 intracellular tip of helix VI and inward shift at the intracellular end of helix VII of the two  
130 CCKRs are within a similar range, suggesting that these receptors activate G proteins by the  
131 same mechanism.

### 132 **Binding modes of small molecules in CCK<sub>A</sub>R**

133 Devazepide binds to CCK<sub>A</sub>R in a pocket bordered by helices II-VII, ECL2 and ECL3 (Fig. 2a).  
134 This antagonist is characterized by a 1,4-benzodiazepine group and an indole moiety<sup>32</sup>. Residue  
135 R336<sup>6.58</sup> is engaged in a  $\pi$ -cation interaction with the indole group and forms a hydrogen bond  
136 with the carbonyl oxygen of the 1,4-benzodiazepine group (Fig. 2b). In addition, the 4-nitrogen  
137 within the benzodiazepine group and the amide nitrogen form two hydrogen bonds with the  
138 residue N333<sup>6.55</sup>. The critical role of N333<sup>6.55</sup> and R336<sup>6.58</sup> in devazepide binding was also  
139 reflected by a notable loss of antagonistic activity of devazepide in our NN9056-induced  
140 inositol phosphate (IP) accumulation assay (Extended Data Table 3) and a complete  
141 abolishment of CCK-8 binding ability for the mutants N333<sup>6.55</sup>A and R336<sup>6.58</sup>A (Extended  
142 Data Table 4). The hydrogen bond between devazepide and N333<sup>6.55</sup> is important for its  
143 affinity, as previous studies showed that chiral change of the 3-carbon within the  
144 benzodiazepine group which eliminates the hydrogen bond led to an over 100-fold decrease of  
145 the binding affinity<sup>33, 34</sup>. In addition to the above interactions, the indole group of devazepide  
146 is further stabilized by hydrophobic interactions with residues A343<sup>ECL3</sup>, E344<sup>ECL3</sup>, L347<sup>ECL3</sup>,  
147 and I352<sup>7.35</sup> in ECL3 and helix VII. The phenyl ring of the benzodiazepine group forms  
148 multiple hydrophobic interactions with N98<sup>2.61</sup>, T117<sup>3.28</sup>, and T118<sup>3.29</sup> in helices II and III,  
149 while the tolyl group penetrates deeply into the binding pocket, making hydrophobic contacts

150 with M121<sup>3.32</sup>, Y176<sup>4.60</sup>, and F330<sup>6.52</sup>. The roles of these residues in devazepide recognition  
151 were investigated by testing the effects of their alanine mutations on the antagonistic activity  
152 of devazepide. The results show that all these mutations impaired the inhibitory activity of  
153 devazepide on NN9056-induced IP production with the exceptions of N98<sup>2.61</sup>A and Y176<sup>4.60</sup>A  
154 (Extended Data Table 3). Among these mutations, T117<sup>3.28</sup>A and F330<sup>6.52</sup>A exhibited the  
155 largest effect, suggesting that they play a vital role in recognizing devazepide.

156 The antagonist lintitript occupies a binding pocket similar to devazepide (Fig. 2c, d).  
157 Instead of the bulky benzodiazepine group, lintitript has a thiazolyl group in the middle portion,  
158 limiting its interaction with helices II and III of the receptor and resulting in a lower binding  
159 affinity to CCK<sub>A</sub>R compared to that of devazepide<sup>34</sup>. Similar hydrogen bonds between lintitript  
160 and N333<sup>6.55</sup> as well as  $\pi$ -cation interaction with R336<sup>6.58</sup> were formed as observed in the  
161 CCK<sub>A</sub>R–devazepide structure, despite their different chemical scaffolds. These polar  
162 interactions are also critical for lintitript recognition, as alanine replacements of N333<sup>6.55</sup> and  
163 R336<sup>6.58</sup> reduced its antagonistic activity by 6-fold and 8-fold, respectively, and completely  
164 abolished the binding of CCK-8. Similar to the indole and tolyl groups of devazepide, the  
165 corresponding groups in lintitript also form multiple hydrophobic interactions with the  
166 receptor. The alanine mutations of the residues that are involved in these hydrophobic  
167 interactions diminished the antagonistic effect of lintitript, except for Y176<sup>4.60</sup>A (Extended  
168 Data Table 3).

### 169 **Binding modes of peptide ligands in CCK<sub>A</sub>R and CCK<sub>B</sub>R**

170 The full CCK<sub>A</sub>R agonist NN9056 is a highly selective peptide analogue synthesized based on  
171 CCK-8<sup>19</sup>. It was developed mainly by introducing D-N-methyl-Asp and N-methyl-Phe instead  
172 of Asp and Phe at the penultimate position and replacing Met with Nle in CCK-8 as well as  
173 adding a C18-acylated fatty chain to the N terminus. Unambiguous electron densities were

174 observed for the C-terminal octapeptide in NN9056, while the long N-terminal modification of  
175 the agonist was not modeled due to the poor density map. NN9056 adopts a binding pose  
176 perpendicular to the membrane plane, with its N terminus pointing to the extracellular surface  
177 and the C terminus penetrating into the helical bundle (Fig. 2e, f). The N terminus of NN9056  
178 is anchored to ECL2 through a salt bridge between the sulfonate group of Y7 (as counted from  
179 the C terminus of CCK; the residues in gastrin is numbered in the same way) and residue R197  
180 in CCK<sub>A</sub>R, which is crucial for CCK<sub>A</sub>R selectivity as the nonsulfated CCK binds selectively  
181 to CCK<sub>B</sub>R<sup>35</sup>. Besides R197, the NN9056 residue Y7 also makes hydrophobic contacts with  
182 residues K105 and M195 in ECL1 and ECL2. This aligns well with previous studies suggesting  
183 that M195<sup>ECL2</sup> is a binding partner for the sulfated tyrosine of CCK<sup>36</sup>. The extracellular binding  
184 moiety of NN9056 is further stabilized by a hydrogen bond between the main-chain nitrogen  
185 of G5 and the side chain of S348 in ECL3. The side chain of R197<sup>ECL2</sup>, which forms an  
186 important salt bridge with the sulfated Y7, is only 3.4 Å away from the C $\alpha$  of G5. Thus, any  
187 other residues replacing this glycine will import a bulkier side chain, which would cause steric  
188 clash with R197 and reduce the binding of CCK-8. Indeed, it was reported that all mutations  
189 on G5, with the exception of N-methylglycin, led to significantly reduced binding affinities<sup>19</sup>.

190 The C-terminal region of NN9056 occupies a similar binding site to that of devazepide  
191 and lintitript, with the side chains of residues W4 and F1 in the agonist overlapping with the  
192 indole and tolyl groups of the antagonists. The side chain of W4 extends toward helices VI and  
193 VII, and ECL3, forming a hydrogen bond with N333<sup>6,55</sup> and hydrophobic interactions with  
194 L347<sup>7,30</sup> and I352<sup>7,35</sup>, while the NN9056 residue D2 builds two hydrogen bonds with Y176<sup>4,60</sup>  
195 and N333<sup>6,55</sup> (Fig. 2f, g). Additionally, the side chain of F1 interacts with a hydrophobic cluster  
196 formed by Y176<sup>4,60</sup>, I329<sup>6,51</sup>, and F330<sup>6,52</sup> in CCK<sub>A</sub>R. The C-terminal amide of NN9056 makes  
197 two hydrogen bonds with N98<sup>2,61</sup> and M121<sup>3,32</sup> to further stabilize the binding between the C  
198 terminus of NN9056 and the receptor. These two polar interactions were supported by



199 mutagenesis studies showing that alanine replacements of N98<sup>2.61</sup> and M121<sup>3.32</sup> were  
200 associated with an over 2-fold reduction of NN9056 potency in inducing IP production.  
201 Different from the mutagenesis results of CCK<sub>AR</sub> with NN9056, the mutations N98<sup>2.61</sup>A,  
202 Y176<sup>ECL2</sup>A, N333<sup>6.55</sup>A and R336<sup>6.58</sup>A displayed a much more predominant influence showing  
203 a 10–200-fold reduction of CCK-8 potency in inducing receptor activation, probably due to the  
204 fact that modifications in NN9056 stabilize the peptide (Extended Data Table 4). Additionally,  
205 two Nle residues in NN9056 do not form any strong interaction with the receptor, which  
206 explains why replacing them with methionine or leucine did not affect the affinity<sup>37, 38</sup>.

207 Unlike the linear peptides CCK and NN9056, the 17-amino-acid peptide gastrin forms a  
208  $\beta$ -hairpin structure (Fig. 2h, i). The five residues in the C terminus insert deeply into the ligand-  
209 binding pocket formed by helices II, III, V, VI, and VII, as well as ECL2 and ECL3, a binding  
210 site similar to that in the crystal structure of CCK<sub>AR</sub>–NN9056. The three amino acids at the C  
211 terminus occupy a similar site to that for the side chain of the sulfated tyrosine of NN9056 in  
212 CCK<sub>AR</sub> (Fig. 3c). This binding mode is supported by our mutagenesis assays, in which alanine  
213 mutations of Y189<sup>4.60</sup>, R356<sup>6.55</sup>, L367<sup>ECL3</sup> and Y380<sup>7.43</sup> completely abolished the binding of  
214 CCK-8 or gastrin-17 (Extended Data Table 6), suggesting key roles of these residues in peptide  
215 recognition. In addition to the interactions engaged by the peptide C terminus, residues at the  
216 N terminus of gastrin-17 locate in a shallow binding cavity shaped by ECL1, ECL2 and ECL3  
217 further improve the binding affinity and ligand selectivity (Fig. 3a, b).

### 218 **Peptide selectivity between CCK<sub>AR</sub> and CCK<sub>BR</sub>**

219 Both gastrin and CCK are vertebrate brain-gut peptides that share a conserved common C-  
220 terminal pentapeptide amide sequence<sup>4, 5</sup> crucial for biological functions, while the N-terminal  
221 extensions, especially the tyrosine residue at position 7 of CCK and position 6 of gastrin (as  
222 counted from the peptide C terminus phenylalanine), serve to increase potency and specificity.

223 Unlike sulfation of the residue Y6 in gastrin, sulfation of CCK-8 in Y7 is critical to its affinity  
224 at CCK<sub>A</sub>R<sup>39</sup>. The residues in the binding pockets of CCK<sub>A</sub>R and CCK<sub>B</sub>R are highly conserved,  
225 however, minor amino acid differences between the two receptors reshape their binding  
226 pockets and allow different peptide preference.

227 As previously described, the C termini of NN9056 and gastrin bind to their respective  
228 receptors in a similar manner and the detailed interactions between the three C-terminal  
229 residues of the peptide and the receptor are almost identical (Fig. 3c). The main difference in  
230 this region is that the histidine residue at position 7.39 of CCK<sub>B</sub>R forms a hydrogen bond with  
231 the main-chain carbonyl of D2 in gastrin, which does not exist in the CCK<sub>A</sub>R–NN9056  
232 complex as the counterpart in CCK<sub>A</sub>R is a leucine. However, starting from W4, these two  
233 peptides show different orientations and thus lead to different binding modes. This is due to  
234 sequence variety in ECL2 between the CCKR family: (i) the residue L200<sup>ECL2</sup> at the end of  
235 ECL2 in CCK<sub>A</sub>R is substituted by W209<sup>ECL2</sup> in CCK<sub>B</sub>R, where the bulky side chain pushes the  
236 side chain of H207<sup>ECL2</sup> toward gastrin to enable a hydrogen bond with the main chain of W4,  
237 dragging this peptide further toward ECL2 in comparison with NN9056 (Fig. 3c). This is  
238 supported by our mutagenesis data showing that replacing H207<sup>ECL2</sup> with an alanine  
239 completely abolished the gastrin binding (Extended Data Table 5); (ii) the key residue  
240 R197<sup>ECL2</sup> in CCK<sub>A</sub>R, which forms a key salt bridge with the sulfated tyrosine in NN9056, is  
241 not conserved and appears as a valine in CCK<sub>B</sub>R. The long side chain of R197<sup>ECL2</sup> is either  
242 locked by this salt bridge or by the negatively charged residue E344<sup>ECL3</sup>, and would cause a  
243 severe spatial hindrance with gastrin and does not allow this peptide to bind to CCK<sub>A</sub>R in the  
244 same manner (Fig. 3e, f). Therefore, our structures explain why gastrin could only bind to  
245 CCK<sub>A</sub>R with a very weak affinity in contrast to CCK. The importance of this polar interaction  
246 was confirmed by our mutagenesis studies, in which the CCK<sub>A</sub>R mutant R197<sup>ECL2</sup>A greatly

247 diminished the binding of CCK-8 and reduced the agonist potency of NN9056 by about 3-fold  
248 in the IP accumulation assay (Extended Data Table 5).

249 The above differences in the binding modes of the peptide agonists result in a distinct  
250 binding environment for the sulfated tyrosine residue. For NN9056, the sulfonate group of Y7  
251 (sul-Y7) anchors into a binding cavity formed by helix II, ECL1 and ECL2 of CCK<sub>AR</sub> (Fig.  
252 3g). The salt bridge between the sul-Y7 and R197<sup>ECL2</sup> breaks the original salt bridge between  
253 R197<sup>ECL2</sup> and E344<sup>ECL3</sup>, opens up the binding pocket, and allows the entrance of CCK (Fig.  
254 3d, g). This is consistent with the fact that the sulfation of CCK improves its affinity by 1,000  
255 folds towards CCK<sub>AR</sub><sup>40</sup>. In the case of CCK<sub>BR</sub>, however, the lack of the spatial hindrance of  
256 R197<sup>ECL2</sup> side chain allows gastrin to bind in a more extended manner, and thus, the gastrin  
257 residue Y6 occupies a position similar to that of the NN0956 residue Y7 but rotated by about  
258 90°, only making hydrogen bonds with ECL2 (Fig. 3b, h). One non-conserved residue,  
259 R208<sup>ECL2</sup> in CCK<sub>BR</sub> (L199<sup>ECL2</sup> in CCK<sub>AR</sub>), reaches out to form a hydrogen bond with the  
260 hydroxyl group of Y7 resulting in an increased peptide affinity. It could be expected that  
261 sulfation of this tyrosine would form electrostatic interactions with R208<sup>ECL2</sup> and further  
262 improve the affinity of gastrin to some extent and indeed, previous studies have shown that the  
263 sulfated gastrin displayed a 10-fold higher binding affinity compared to the non-sulfated  
264 form<sup>39</sup>.

265 The N-terminal extension of gastrin, especially the tryptophan and pyroglutamic acid  
266 residues at positions 14 and 17, also interacts with the receptor through several hydrogen bonds  
267 with residues N115<sup>2,65</sup> and R57<sup>1,35</sup> in CCK<sub>BR</sub> to improve its affinity and selectivity. For  
268 instance, the side chain of W14 would form a severe clash with the side chain of R197<sup>ECL2</sup> in  
269 CCK<sub>AR</sub>, thereby reducing the ability of gastrin to bind this receptor. In addition to the  
270 interactions with CCK<sub>AR</sub>, W14 also forms extensive interactions with W4 within gastrin,  
271 stabilizing the peptide in a conformation different from that of NN9056 (Fig. 3e, f).

## 272 **Stepwise activation process of CCK<sub>A</sub>R**

273 CCK<sub>A</sub>R could be activated by CCK-8 both in sulfated and non-sulfated forms at different  
274 potencies. To study the binding mode of endogenous agonist CCK-8ns (non-sulfated CCK-8),  
275 docking and molecular dynamic simulation studies on the basis of the cryo-EM structure of  
276 CCK-8–CCK<sub>A</sub>R–G<sub>q</sub> complex structure reported in our companion paper were performed (Fig.  
277 4a). The predicted binding site of CCK-8ns in CCK<sub>A</sub>R is similar to the binding site of NN9056,  
278 which is a peptide mimic of the sulfated CCK-8, despite lacking of key interactions between  
279 the sulfonate group of NN9056 and CCK<sub>A</sub>R. Superimposing the CCK<sub>A</sub>R structures reveals that  
280 the NN9056-bound CCK<sub>A</sub>R is in a similar conformation to that of devazepide-bound receptors  
281 (C $\alpha$  RMSD = 0.48), but differs from that of the G protein-coupled CCK<sub>A</sub>R reported in our  
282 companion paper (C $\alpha$  RMSD = 1.86 Å) (Extended Data Fig. 5), suggesting that the agonist  
283 itself is not sufficient to fully stabilize the active conformation.

284 The CCK<sub>A</sub>R–devazepide, CCK<sub>A</sub>R–NN9056 and the simulated CCK-8ns–CCK<sub>A</sub>R–G  
285 protein structures provide a systematic view of CCK<sub>A</sub>R in antagonist bound, agonist bound and  
286 agonist–G-protein bound states, which allows an in-depth analysis of the activation process of  
287 CCK<sub>A</sub>R. Structural comparison of CCK<sub>A</sub>R in complex with different types of ligands indicates  
288 that the position of the indole group in the ligands, which forms extensive interactions with  
289 ECL3, might play a key role in regulating receptor activity. The indole groups of devazepide  
290 and lintitript that mimic the side chain of the peptide residue W4 are 1.1 Å away from ECL3  
291 compared to that in the peptide ligands (Fig. 3i). This difference suggests that conformational  
292 change in ECL3 may be involved in modulating receptor activation (Extended Data Fig. 6).  
293 Indeed, the extracellular half of the CCK<sub>A</sub>R structures of different active states overlap with  
294 each other except that ECL3 bends down by 2.9 Å (measured at the C $\alpha$  carbon of G349),  
295 leading to a counterclockwise twisting of the extracellular regions of helices VI and VII  
296 (extracellular view) and side-chain reorientations of several key residues within the ligand-

297 binding pocket (Fig. 4a–c). The inward movement of ECL3 allows the agonist to penetrate  
298 deeper in the binding pocket, forming a spatial hindrance and pushing the side chain of F330<sup>6.52</sup>.  
299 The downward movement of F330<sup>6.52</sup> in turn influences the side chain of W326<sup>6.48</sup> and induces  
300 an outward movement of the side chains of F218<sup>5.47</sup>, F322<sup>6.44</sup> and F323<sup>6.45</sup>, thereby resulting in  
301 a significant increase of the peptide-receptor interface area (from 1,797 Å<sup>2</sup> to 2,424 Å<sup>2</sup>).  
302 Besides W326<sup>6.48</sup> and F322<sup>6.44</sup>, which were previously indicated as ‘transmission switch’ in  
303 FPR<sup>29</sup>, the P230<sup>5.50</sup> in the PIF motif also showed an inward shift upon activation. Consistently,  
304 several newly formed polar contacts including three hydrogen bonds between the CCK residue  
305 D7 and the residues H210<sup>5.39</sup>, N333<sup>6.55</sup> and R336<sup>6.58</sup> of the receptor were observed in the active  
306 CCK<sub>A</sub>R structure. Accompanying these movements initiated at the bottom of the ligand-  
307 binding pocket, both the sodium pocket and transmission switch (P<sup>5.50</sup>T<sup>3.40</sup>F<sup>6.44</sup> and CW<sub>X</sub>P<sup>6.50</sup>  
308 motifs) rearrange their residue contacts (Fig. 4d, e). By pointing to helix VI, S362<sup>7.45</sup> forms  
309 two hydrogen bonds with W326<sup>6.48</sup> and N366<sup>7.46</sup>, yielding a 2.4 Å-downward movement of  
310 W326<sup>6.48</sup> and a 2.3 Å-inward movement of N366<sup>7.46</sup> (measured at the C $\alpha$  carbon of N366<sup>7.46</sup>),  
311 relative to those in the NN9056-bound structure. Despite no obvious sodium density was  
312 observed in all our CCKR structures, the distance between residues in sodium binding pocket  
313 such as D100<sup>2.50</sup> and N366<sup>7.49</sup> was closer upon activation (3.4 Å to 2.7 Å), forming a stronger  
314 interaction between helices II and VII. Meanwhile, the side chain of F322<sup>6.44</sup> stretches out from  
315 the transmembrane domain core and the hydrophobic lock (L132<sup>3.43</sup>, I318<sup>6.40</sup> and V319<sup>6.41</sup>) is  
316 broken, which further loosens the helices III-VI packing and facilitates the outward movement  
317 of the cytoplasmic end of helix VI.

318 On the intracellular side of the G protein-coupled CCK<sub>A</sub>R structure, helix VI of the  
319 receptor moves outwards by 6.0 Å (measured at the C $\alpha$  carbon of A302<sup>6.24</sup>), while helix VI  
320 extends by ten residues and moves outwards by about 2.0 Å (Y237<sup>5.66</sup> as a reference). In  
321 addition, helix VII rotates inward and moves toward helix III by 5.2 Å (measured at the C $\alpha$

322 carbon of Y370<sup>7,53</sup>). In contrast to the restrains of the hydrogen bond with T76<sup>2,39</sup> and the salt  
323 bridge with E138<sup>3,49</sup> in the inactive state, R139<sup>3,50</sup> exchanges these polar contacts upon agonist  
324 binding with interaction at the C terminus of  $\alpha 5$  helix in the  $G\alpha$  subunit. Surprisingly, helix  
325 VIII of CCK<sub>A</sub>R was found in a non-canonical position that is perpendicular to the helical  
326 bundle without contacting any transmembrane helices in both agonist- or antagonist-bound  
327 structures. Upon G protein binding, helix VIII rotates toward helix I and resembles that of other  
328 class A GPCRs. Collectively, these movements create an intracellular crevice for G protein  
329 coupling.

330 In summary, we solved the CCK<sub>A</sub>R structures at different activation states and the  
331 structures of CCK<sub>B</sub>R in complex with different G proteins. Supported by receptor binding and  
332 signaling profile data, these structures help us better understand multiple aspects of CCK  
333 receptor biology including recognition of different types of ligands and peptide selectivity in  
334 the CCKR family, as well as the activation process of CCK<sub>A</sub>R.

## 335 References

- 336 1. Johnsen, A.H. Phylogeny of the cholecystokinin/gastrin family. *Frontiers in*  
337 *Neuroendocrinology* **19**, 73-99 (1998).
- 338 2. Rehfeld, J.F., Friis-Hansen, L., Goetze, J.P. & Hansen, T.V.O. The biology of  
339 cholecystokinin and gastrin peptides. *Current Topics in Medicinal Chemistry* **7**, 1154-  
340 1165 (2007).
- 341 3. Deschenes, R.J. *et al.* Cloning and sequence analysis of a cDNA encoding rat  
342 preprocholecystokinin. *Proc Natl Acad Sci U S A* **81**, 726-730 (1984).
- 343 4. Rehfeld, J.F. Cholecystokinin-From Local Gut Hormone to Ubiquitous Messenger.  
344 *Front Endocrinol (Lausanne)* **8**, 47 (2017).
- 345 5. Schubert, M.L. & Rehfeld, J.F. Gastric Peptides-Gastrin and Somatostatin.  
346 *Comprehensive Physiology* **10**, 197-228 (2020).
- 347 6. Wank, S.A. Cholecystokinin receptors. *Am J Physiol* **269**, G628-646 (1995).
- 348 7. Dufresne, M., Seva, C. & Fourmy, D. Cholecystokinin and gastrin receptors.  
349 *Physiological Reviews* **86**, 805-847 (2006).
- 350 8. Foucaud, M. *et al.* Insights into the binding and activation sites of the receptors for  
351 cholecystokinin and gastrin. *Regulatory Peptides* **145**, 17-23 (2008).
- 352 9. Rehfeld, J.F. Gastrointestinal Hormones and Their Targets. *Microbial Endocrinology:*  
353 *The Microbiota-Gut-Brain Axis in Health and Disease* **817**, 157-175 (2014).
- 354 10. Scemama, J.L. *et al.* Cck and Gastrin Inhibit Adenylate-Cyclase Activity through a  
355 Pertussis Toxin-Sensitive Mechanism in the Tumoral Rat Pancreatic Acinar Cell-Line

- 356 Ar 4-2j. *Febs Letters* **242**, 61-64 (1988).
- 357 11. Yassin, R.R. & Abrams, J.T. Gastrin induces IP3 formation through phospholipase C-  
358 gamma 1 and pp60(c-src) kinase. *Peptides* **19**, 47-55 (1998).
- 359 12. Ritter, R.C., Covasa, M. & Matson, C.A. Cholecystokinin: proofs and prospects for  
360 involvement in control of food intake and body weight. *Neuropeptides* **33**, 387-399  
361 (1999).
- 362 13. Crawley, J.N. & Corwin, R.L. Biological Actions of Cholecystokinin. *Peptides* **15**, 731-  
363 755 (1994).
- 364 14. Noble, F. & Roques, B.P. CCK-B receptor: Chemistry, molecular biology, biochemistry  
365 and pharmacology. *Progress in Neurobiology* **58**, 349-379 (1999).
- 366 15. Irwin, N., Hunter, K., Montgomery, I.A. & Flatt, P.R. Comparison of independent and  
367 combined metabolic effects of chronic treatment with (pGlu-Gln)-CCK-8 and long-  
368 acting GLP-1 and GIP mimetics in high fat-fed mice. *Diabetes Obesity & Metabolism*  
369 **15**, 650-659 (2013).
- 370 16. Trevaskis, J.L. *et al.* Synergistic metabolic benefits of an exenatide analogue and  
371 cholecystokinin in diet-induced obese and leptin-deficient rodents. *Diabetes Obesity &*  
372 *Metabolism* **17**, 61-73 (2015).
- 373 17. Evans, B.E. *et al.* Design of potent, orally effective, nonpeptidal antagonists of the  
374 peptide hormone cholecystokinin. *Proc Natl Acad Sci U S A* **83**, 4918-4922 (1986).
- 375 18. Gully, D. *et al.* Peripheral biological activity of SR 27897: a new potent non-peptide  
376 antagonist of CCKA receptors. *Eur J Pharmacol* **232**, 13-19 (1993).
- 377 19. Sensfuss, U. *et al.* Structure-Activity Relationships and Characterization of Highly  
378 Selective, Long-Acting, Peptide-Based Cholecystokinin 1 Receptor Agonists. *Journal*  
379 *of Medicinal Chemistry* **62**, 1407-1419 (2019).
- 380 20. Christoffersen, B.O. *et al.* Long-acting CCK analogue NN9056 lowers food intake and  
381 body weight in obese Gottingen Minipigs. *International Journal of Obesity* **44**, 447-  
382 456 (2020).
- 383 21. Orikawa, Y. *et al.* Z-360, a novel therapeutic agent for pancreatic cancer, prevents up-  
384 regulation of ephrin B1 gene expression and phosphorylation of NR2B via suppression  
385 of interleukin-1 beta production in a cancer-induced pain model in mice. *Mol Pain* **6**,  
386 72 (2010).
- 387 22. Chau, I. *et al.* Gastrazole (JB95008), a novel CCK2/gastrin receptor antagonist, in the  
388 treatment of advanced pancreatic cancer: results from two randomised controlled trials.  
389 *Br J Cancer* **94**, 1107-1115 (2006).
- 390 23. Lu, L., Zhang, B., Liu, Z. & Zhang, Z. Reactivation of cocaine conditioned place  
391 preference induced by stress is reversed by cholecystokinin-B receptors antagonist in  
392 rats. *Brain Res* **954**, 132-140 (2002).
- 393 24. Huppi, K., Siwarski, D., Pisegna, J.R. & Wank, S. Chromosomal Localization of the  
394 Gastric and Brain Receptors for Cholecystokinin (Cckar and Cckbr) in Human and  
395 Mouse. *Genomics* **25**, 727-729 (1995).
- 396 25. Zhou, Q.T. *et al.* Common activation mechanism of class A GPCRs. *Elife* **8** (2019).
- 397 26. White, J.F. *et al.* Structure of the agonist-bound neurotensin receptor. *Nature* **490**, 508-  
398 + (2012).
- 399 27. Shihoya, W. *et al.* Activation mechanism of endothelin ETB receptor by endothelin-1.  
400 *Nature* **537**, 363-368 (2016).
- 401 28. Chen, S.H. *et al.* Human substance P receptor binding mode of the antagonist drug  
402 aprepitant by NMR and crystallography. *Nature Communications* **10** (2019).
- 403 29. Zhuang, Y. *et al.* Structure of formylpeptide receptor 2-Gi complex reveals insights into  
404 ligand recognition and signaling. *Nat Commun* **11**, 885 (2020).
- 405 30. Krishna Kumar, K. *et al.* Structure of a Signaling Cannabinoid Receptor 1-G Protein

- 406 Complex. *Cell* **176**, 448-458 e412 (2019).  
407 31. Xing, C. *et al.* Cryo-EM Structure of the Human Cannabinoid Receptor CB2-Gi  
408 Signaling Complex. *Cell* **180**, 645-654 e613 (2020).  
409 32. Hill, D.R. & Woodruff, G.N. Differentiation of Central Cholecystokinin Receptor-  
410 Binding Sites Using the Nonpeptide Antagonists Mk-329 and L-365,260. *Brain*  
411 *Research* **526**, 276-283 (1990).  
412 33. Satoh, Y. *et al.* Studies on a Novel, Potent and Orally Effective Cholecystokinin-a  
413 Antagonist, Fk-480 - Synthesis and Structure-Activity-Relationships of Fk-480 and  
414 Related-Compounds. *Chemical & Pharmaceutical Bulletin* **42**, 2071-2083 (1994).  
415 34. Cawston, E.E. *et al.* Molecular Basis for Binding and Subtype Selectivity of 1,4-  
416 Benzodiazepine Antagonist Ligands of the Cholecystokinin Receptor. *Journal of*  
417 *Biological Chemistry* **287**, 18618-18635 (2012).  
418 35. Saito, A., Sankaran, H., Goldfine, I.D. & Williams, J.A. Cholecystokinin receptors in  
419 the brain: characterization and distribution. *Science* **208**, 1155-1156 (1980).  
420 36. Gigoux, V. *et al.* Met-195 of the cholecystokinin-A receptor interacts with the sulfated  
421 tyrosine of cholecystokinin and is crucial for receptor transition to high affinity state.  
422 *Journal of Biological Chemistry* **273**, 14380-14386 (1998).  
423 37. Fourniezaluski, M.C. *et al.* Conformational-Analysis and Structural Activity  
424 Relationships of Cholecystokinin Peptides. *Annals of the New York Academy of*  
425 *Sciences* **448**, 598-600 (1985).  
426 38. Holladay, M.W. *et al.* Synthesis and biological activity of CCK heptapeptide analogues.  
427 Effects of conformational constraints and standard modifications on receptor subtype  
428 selectivity, functional activity in vitro, and appetite suppression in vivo. *J Med Chem*  
429 **35**, 2919-2928 (1992).  
430 39. Huang, S.C. *et al.* Importance of sulfation of gastrin or cholecystokinin (CCK) on  
431 affinity for gastrin and CCK receptors. *Peptides* **10**, 785-789 (1989).  
432 40. Silvente-Poirot, S., Dufresne, M., Vaysse, N. & Fourmy, D. The peripheral  
433 cholecystokinin receptors. *Eur J Biochem* **215**, 513-529 (1993).  
434 41. Laskowski, R.A. & Swindells, M.B. LigPlot+: multiple ligand-protein interaction  
435 diagrams for drug discovery. *J Chem Inf Model* **51**, 2778-2786 (2011).  
436



437

## Figures

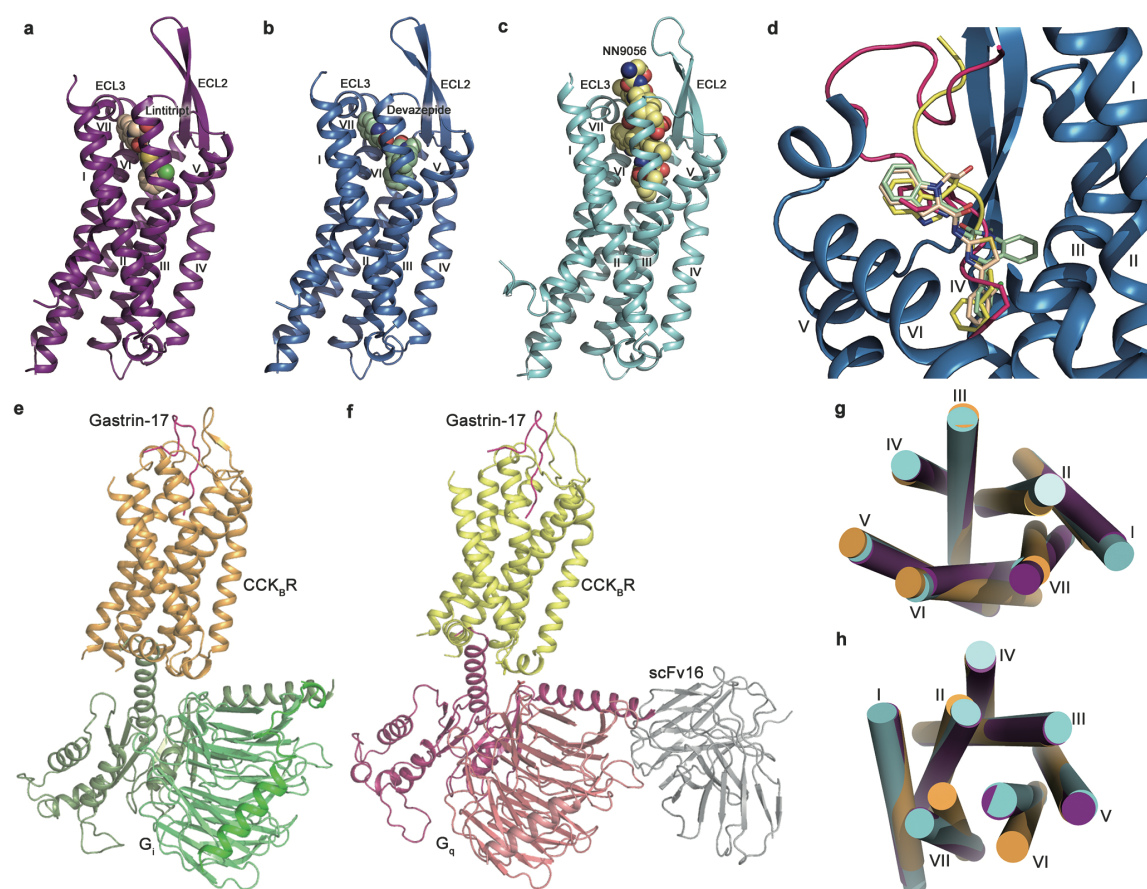

438

439

**Fig. 1 | Overall structures of the CCK<sub>A</sub>R and CCK<sub>B</sub>R.** **a–c**, Crystal structures of the CCK<sub>A</sub>R–lantitript (**a**), CCK<sub>A</sub>R–devazepide (**b**) and CCK<sub>A</sub>R–NN9056 (**c**) complexes. The receptors are shown in deep-purple, marine and cyan cartoon representation, respectively. Lantitript is shown as spheres with carbons in wheat. Devazepide is shown as spheres with carbons in pale-green. NN9056 is shown as spheres with carbons in pale-yellow. **d**, the comparison of antagonists and agonists binding position superimposed in CCK<sub>A</sub>R. The antagonists are shown in sticks and peptide agonists are shown in cartoon with key residues in stick. All the ligands are colored as in corresponding panel in this figure. **e, f**, Cryo-EM structures of CCK<sub>B</sub>R in complex with gastrin-17 and G<sub>i</sub> or G<sub>q</sub>. The receptors are shown in bright-orange and yellow, respectively. Gastrin-17 in shown as hot-pink sticks. The G<sub>i2</sub> trimers are shown in smudge, lime and green cartoons, and the G<sub>q</sub> trimers are shown in warm-pink, deep-salmon and salmon cartoons, respectively. **g, h**, Comparison of helical bundles of CCK<sub>A</sub>R

450

451 in inactive (CCK<sub>A</sub>R–linitript), partially active (CCK<sub>A</sub>R–NN9056) and CCK<sub>B</sub>R in fully active  
452 state (gastrin-17–CCK<sub>B</sub>R–G<sub>i</sub>) on extracellular (**f**) and intracellular (**g**) sides. The receptors are  
453 colored as described above.

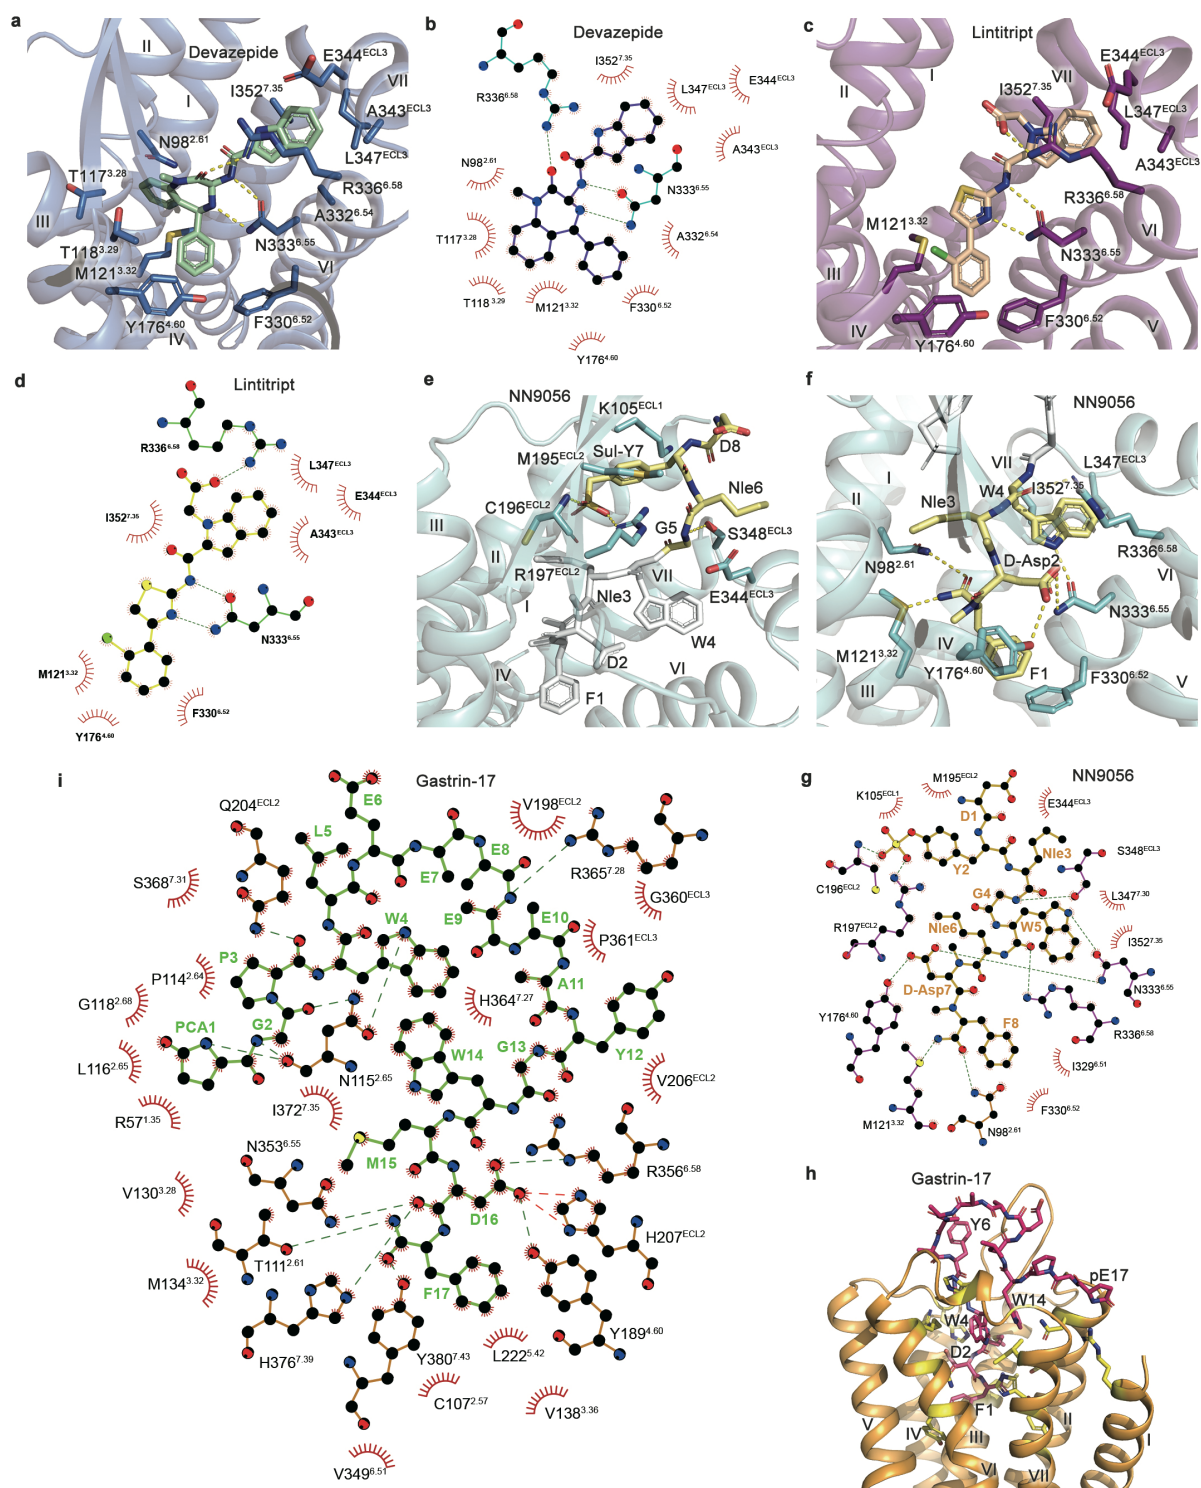

454

455 **Fig. 2 | Small-molecule ligand binding pocket of CCKRs.** **a**, Interactions between  
 456 devazepide and CCK<sub>A</sub>R. The CCK<sub>A</sub>R residues involved in interactions are shown as cyan  
 457 sticks. Devazepide is displayed as blue sticks. Polar interactions are shown as yellow dashed  
 458 lines. **b**, Schematic representation of the interactions between CCK<sub>A</sub>R and devazepide

459 analyzed using the LigPlot<sup>+</sup> program<sup>41</sup>. Interactions between lintitript and CCK<sub>A</sub>R (**c**) and  
460 schematic representation (**d**). The CCK<sub>A</sub>R residues involved in interactions are shown as green  
461 sticks. Lintitript is displayed as yellow sticks. **e–g**, Interactions between top region (**e**) and  
462 bottom region (**f**) of NN9056 and CCK<sub>A</sub>R and schematic representation (**g**). The CCK<sub>A</sub>R  
463 residues involved in interactions are shown as brown sticks. NN9056 is displayed as magenta  
464 sticks. Polar interactions are shown as yellow dashed lines. Interactions between gastrin-17 and  
465 CCK<sub>B</sub>R (**h**) and schematic representation (**i**). The CCK<sub>B</sub>R residues responsible for important  
466 interactions are shown as pale-cyan sticks. Gastrin-17 is displayed as hot-pink sticks.

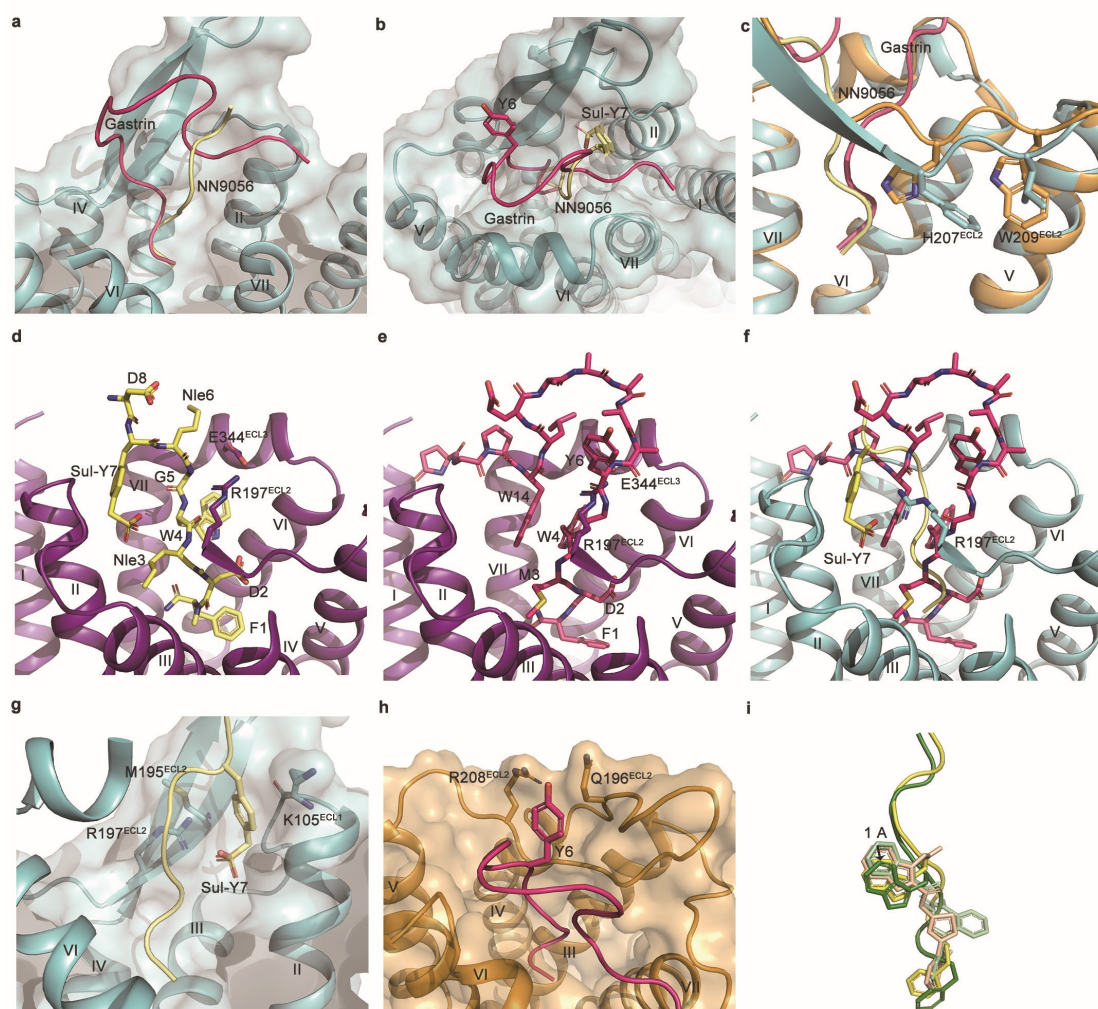

467

468 **Fig. 3 | Comparison of peptide binding in CCKRs. a,** Comparison of peptide conformation.

469 The CCK<sub>A</sub>R and NN9056 are shown in cyan and pale-yellow cartoons, respectively. The

470 gastrin-17 is shown in hot-pink cartoons and aligned to the same position in CCK<sub>A</sub>R. **b,**

471 Comparison of important tyrosine residue in NN9056 and gastrin-17. The side chains of Y7 in

472 CCK-8 and Y6 in gastrin-17 are shown in pale-yellow sticks and hot-pink sticks, respectively.

473 **c,** Comparison of peptide C terminus in corresponding receptors. CCK<sub>A</sub>R and CCK<sub>B</sub>R are

474 shown in cyan and bright-orange cartoons, respectively. NN9056 and gastrin-17 are shown in

475 pale-yellow and hot-pink cartoon representation. The side chains of H207 and W209 of CCK<sub>B</sub>R

476 and their corresponding residues in CCK<sub>A</sub>R are shown in sticks. **d,** Superposition of NN9056

477 in inactive CCK<sub>A</sub>R (represented by the CCK<sub>A</sub>R–linitript structure). The receptor and NN9056

478 are shown in deep-purple cartoons and pale-yellow sticks, respectively. The salt bridge of R197

479 and E344 are shown in brown sticks. **e, f**, Superposition of gastrin-17 in inactive CCK<sub>A</sub>R  
480 (represented by the CCK<sub>A</sub>R–linitript structure) and active CCK<sub>A</sub>R (represented by the  
481 CCK<sub>A</sub>R–NN9056 structure). The receptor and gastrin-17 are shown in deep-purple cartoons  
482 and hot-pink sticks, respectively. **g, h**, Peptide binding pocket of CCK<sub>A</sub>R–NN9056 and  
483 CCK<sub>B</sub>R–gastrin-17. The receptors are shown in cartoon and surface representation. NN9056  
484 and gastrin-17 are shown in pale-yellow and hot-pink sticks, respectively. **i**, The binding  
485 position comparison of peptide agonists and small-molecule antagonists. The agonists NN9056  
486 and CCK-8 are shown in pale-yellow and forest green cartoon and sticks, and small-molecule  
487 antagonists linitript and devazepide are shown in wheat and pale-green sticks, respectively.

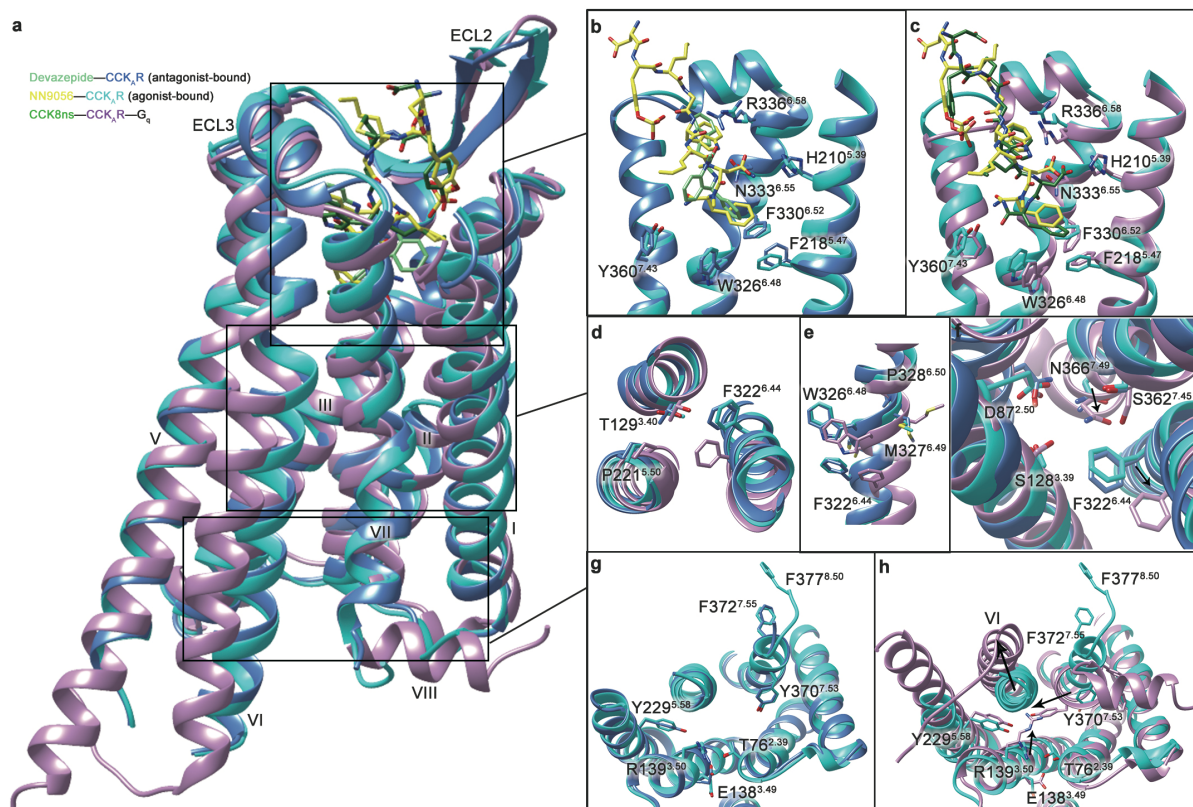

**Fig. 4 | Activation process of CCK<sub>R</sub>.** **a**, Superimposition of the agonist-bound CCK<sub>R</sub> structure with that bound to antagonist or both agonist and G<sub>q</sub> (obtained in the accompanied paper). G protein is omitted for clarity. **b, c**, Conformational difference of the ligand-binding pocket among distinct states. **d-f**, Structural rearrangements of residue contacts occurred in PIF (**d**), FxxCWxP (**e**) and sodium pocket (**f**). **g, h**, Structural changes in the intracellular ends of helices VI and VII induced by agonist binding and G<sub>q</sub> coupling. Conformational changes are indicated with black arrows.

488  
 489

490  
 491  
 492  
 493  
 494

## 495 **Methods**

### 496 **Construct cloning**

497 For crystallization studies of CCK<sub>A</sub>R, the human CCK<sub>A</sub>R gene was cloned into a modified  
498 pFastBac1 vector (Invitrogen), which contains an expression cassette with a hemagglutinin  
499 (HA) signal sequence followed by a Flag tag at the N terminus as well as a PreScission protease  
500 site followed by a 10 × His tag at the C terminus. To facilitate crystallization, T4L was inserted  
501 into between I240 and A302 at ICL3 of CCK<sub>A</sub>R with the truncation of the C-terminal residues  
502 G407–Q428. One mutation F130<sup>3,41</sup>W was introduced to solve the CCK<sub>A</sub>R–NN9056 complex  
503 structure. The construct was further optimized with D87<sup>2,50</sup>N to solve the structure of CCK<sub>A</sub>R–  
504 devazepide and CCK<sub>A</sub>R–linitript complex structures.

505 For cryo-EM studies of CCK<sub>B</sub>R, the human CCK<sub>B</sub>R gene was cloned into a modified  
506 pFastBac1 vector (Invitrogen) with N-terminal HA signal sequence connected to a Flag-tag  
507 and C-terminal PreScission protease site followed by a 2 × Strep-tag. The construct was further  
508 optimized by truncation of C-terminal residues 419–447 to improve the protein yield and  
509 homogeneity. According to previous studies, a chimera G<sub>q</sub> was generated by replacing N-  
510 terminal 30 amino acids with the N-terminal 24 amino acids of G<sub>i1</sub><sup>42</sup>. A dominant-negative G<sub>i2</sub>  
511 (DNG<sub>i2</sub>) gene was generated as previously described by introducing four Gα<sub>i2</sub> subunit  
512 mutations, S47N, G204A, E246A and A327S. Both G<sub>q</sub> and G<sub>i2</sub> genes are cloned into the  
513 pFastBac1 vector. The human Gβ<sub>1</sub> and Gγ<sub>2</sub> subunits were integrated into the pFastBac Dual  
514 vector (Invitrogen) with an N-terminal 6 × His-tag at the N terminus of Gβ<sub>1</sub>. The scFv16 gene  
515 was cloned into a modified expression vector pFastBac1 with an N-terminal GP67 signaling  
516 peptide and a C-terminal 8 × His tag.

### 517 **Protein expression**

518 The Bac-to-Bac baculovirus expression system (Invitrogen) was used to generate high-titer  
519 recombinant baculovirus (>10<sup>9</sup> viral particles per ml). Expression of CCK<sub>A</sub>R was carried out



520 by infection of *Spodoptera frugiperda* (*Sf9*) cells at a cell density of  $2-3 \times 10^6$  cells/ml with  
521 virus at a multiplicity of infection (MOI) of 5. Transfected cells were cultured at 27 °C for 48  
522 h and then collected by centrifugation and stored at  $-80$  °C until use.

523 For the CCK<sub>B</sub>R–gastrin-17–G<sub>q</sub> complex, the modified CCK<sub>B</sub>R, G $\alpha_q$ , G $\beta_1\gamma_2$  and Ric8A  
524 (resistance to inhibitors of cholinesterase 8A), were co-expressed in High Five insect cells  
525 (Invitrogen) using the Bac-to-Bac baculovirus expression system. Cells at a density of  $1.5 \times$   
526  $10^6$  cells per ml were infected with high-titer virus at a MOI ratio of 2:1:1:1 for CCK<sub>B</sub>R, G $\alpha_q$ ,  
527 G $\beta_1\gamma_2$  and Ric8A. For the CCK<sub>B</sub>R–gastrin-17–G<sub>i2</sub> complex, the modified CCK<sub>B</sub>R, G $\alpha_{i2}$  and  
528 G $\beta_1\gamma_2$  were co-expressed in High Five cells using the Bac-to-Bac baculovirus expression  
529 system. Cells at a density of  $3 \times 10^6$  cells per ml were infected with high-titer virus at a MOI  
530 ratio of 2:1:1 for CCK<sub>B</sub>R, G $\alpha_{i2}$  and G $\beta_1\gamma_2$ . Cells were cultured at 27 °C and harvested 48 h after  
531 infection by centrifugation and stored at  $-80$  °C until use.

### 532 **Purification of CCK<sub>A</sub>R–devazepide, CCK<sub>A</sub>R–linitript and CCK<sub>A</sub>R–NN9056 complexes**

533 Insect cells were disrupted by thawing frozen pellets in a hypotonic buffer containing 10 mM  
534 HEPES, pH 7.5, 10 mM MgCl<sub>2</sub>, 20 mM KCl and EDTA-free protease inhibitor cocktail  
535 (Roche) with the ratio of 1 tablet per 100 ml lysis buffer. Extensive washing was performed by  
536 repeated centrifugation in the same buffer and then in a high salt buffer containing 10 mM  
537 HEPES, pH 7.5, 10 mM MgCl<sub>2</sub>, 20 mM KCl and 1 M NaCl (two times each).

538 The purified membranes were thawed on ice in the presence of 2 mg/ml iodoacetamide and  
539 EDTA-free protease inhibitor cocktail, and incubated at 4 °C for 1 h before solubilization. The  
540 CCK<sub>A</sub>R–T4L was solubilized in a buffer containing 50 mM HEPES, pH 7.5, 300 mM NaCl,  
541 0.5% (w/v) DDM, 0.1% (w/v) CHS, 10% glycerol with 50  $\mu$ M linitript, 40  $\mu$ M devazepide,  
542 and 50  $\mu$ M NN9056, respectively, at 4 °C for 3 h. The supernatant was isolated by  
543 centrifugation at 160,000 g for 30 min and incubated with TALON superflow metal affinity  
544 resin (Clontech) at 4 °C overnight. The resin was washed with 20 column volumes of wash

545 buffer containing 25 mM HEPES, pH 7.5, 300 mM NaCl, 10% (v/v) glycerol, 0.05% (w/v)  
546 DDM, 0.01% (w/v) CHS, 30 mM imidazole and 50  $\mu$ M lintitript, 40  $\mu$ M devazepide, or 50  $\mu$ M  
547 NN9056. The protein was eluted with 5 column volumes of elute buffer containing 50 mM  
548 HEPES, pH 7.5, 300 mM NaCl, 10% (v/v) glycerol, 0.05% (w/v) DDM, 0.01% (w/v) CHS,  
549 300 mM imidazole and 50  $\mu$ M lintitript, 40  $\mu$ M devazepide, or 50  $\mu$ M NN9056. A PD MiniTrap  
550 G-25 column (GE Healthcare) was used to remove imidazole. The protein was then treated  
551 overnight with His-tagged PreScission protease and His-tagged PNGase F to remove the C-  
552 terminal His tag and de-glycosylate the receptor. PreScission protease, PNGase F and the  
553 cleaved 10  $\times$  His tag were removed by passing the sample through Ni-NTA superflow resin  
554 (QIAGEN). The receptor was concentrated to 20–30 mg/ml with a 100 kDa cut-off  
555 concentrator (Millipore). Protein purity and mono-dispersity were examined by Nu-PAGE and  
556 analytical size-exclusion chromatography.

### 557 **Crystallization of CCK<sub>A</sub>R–devazepide, CCK<sub>A</sub>R–lintitript and CCK<sub>A</sub>R–NN9056** 558 **complexes**

559 The CCK<sub>A</sub>R complex samples were crystallized using the lipid cubic phase (LCP) method by  
560 mixing 40% protein with 60% lipid (monoolein and cholesterol 10:1 by mass) using a syringe  
561 lipid mixer. After a clear LCP formed, the mixture was dispensed onto glass sandwich plates  
562 (Shanghai FAstal BioTech) into 40 nl drop and overlaid with 800 nl precipitant solution using  
563 a Gryphon robot (Art-Robbins). Crystals of the CCK<sub>A</sub>R–lintitript complex appeared after 2  
564 days and grew to full size within 2 weeks in 0.1 M HEPES, pH 7.0–7.5, 20%–30% (v/v)  
565 PEG400, 200–300 mM sodium tartrate and 1%–2% 1,2-butanediol. The CCK<sub>A</sub>R–devazepide  
566 complex was crystallized in 0.1 M HEPES, pH 7.0–7.5, 20%–30% (v/v) PEG400 and 300–400  
567 mM ammonium acetate. The CCK<sub>A</sub>R–NN9056 complex was crystallized in 0.1M HEPES, pH  
568 7.0–7.5, 8%–12% (v/v) PPG400 and 50–100 mM ammonium acetate. Crystals were harvested

569 from LCP using 50  $\mu\text{m}$  micromounts (M2-L19-100/150, MiTeGen) and flash frozen in liquid  
570 nitrogen.

### 571 **Data collection and structure determination**

572 X-ray diffraction data were collected at the SPring-8 beam line 41XU, Hyogo, Japan, using a  
573 10  $\mu\text{m}$  beam (at a wavelength of 1.0000  $\text{\AA}$ ) and a Pilatus 3 6M detector. Crystals were exposed  
574 with a 10  $\mu\text{m}$   $\times$  8  $\mu\text{m}$  beam for 0.2 s and 0.2  $^\circ$  oscillation per frame. Data from the 34 best  
575 diffracting crystals of the CCK<sub>A</sub>R–linitript complex, 17 crystals of the CCK<sub>A</sub>R–devazepide  
576 complex and 44 crystals of the CCK<sub>A</sub>R–NN9056 complex were processed using XDS<sup>43</sup>. Initial  
577 phase information was obtained by molecular replacement using the structures of NPY1R  
578 (PDB accession number 5ZBQ) and T4L (PDB accession number 1C6P), respectively, with  
579 the program Phaser<sup>44</sup>. All refinements were performed with Phenix<sup>45</sup>, followed by manual  
580 examination and rebuilding of the refined coordinates in the program COOT<sup>46</sup> using both  $|2Fo|$   
581  $- |Fc|$  and  $|Fo| - |Fc|$  maps. The Ramachandran plot indicates that 94.5% (5.5%) of residues in  
582 the CCK<sub>A</sub>R–devazepide, 94.7% (5.3%) of residues in the CCK<sub>A</sub>R–linitript and 90.3% (9.7%)  
583 of residues in the CCK<sub>A</sub>R–NN9056 complexes were in favored (allowed) region (no outliers).  
584 The final model of the CCK<sub>A</sub>R–devazepide complex contains 278 residues of CCK<sub>A</sub>R (K37–  
585 I240, A302–K375) and 160 residues (1–160) of T4 lysozyme; the final model of the CCK<sub>A</sub>R–  
586 linitript complex contains 279 residues of CCK<sub>A</sub>R (K37–I240, A302–R376) and 160 residues  
587 (1–160) of T4 lysozyme; and the final model of the CCK<sub>A</sub>R–NN9056 complex contains 283  
588 residues of CCK<sub>A</sub>R (K37–I240, A302–G380) and 160 residues (1–160) of T4 lysozyme. The  
589 remaining N- and C-terminal residues of CCK<sub>A</sub>R are disordered and were not modeled. Data  
590 collection and structure refinement results are shown in Extended Data Table 1.

### 591 **CCK<sub>B</sub>R–gastrin-17–G<sub>q</sub> and CCK<sub>B</sub>R–gastrin-17–G<sub>i2</sub> complex formation and purification**

592 Cells were thawed on ice and suspended in a buffer containing 20 mM HEPES, pH 7.5, 50 mM  
593 NaCl, 2 mM MgCl<sub>2</sub> and 100  $\mu\text{g}/\text{ml}$  protease inhibitor (PanReac Appllichem). Both CCK<sub>B</sub>R–

594 gastrin-17-G<sub>q</sub> and CCK<sub>B</sub>R-gastrin-17-G<sub>i2</sub> complexes were formed on membrane by adding  
595 50 μM gastrin-17 and 25 mU/ml apyrase (New England Bio-Labs), followed by incubation at  
596 20 °C for 1 h. The membrane pellets were collected by ultra-centrifugation at 100,000 g for 30  
597 min. The CCK<sub>B</sub>R-gastrin-17-G<sub>q</sub> complex was extracted from the membrane using a buffer  
598 containing 50 mM HEPES, pH 7.5, 300 mM NaCl, 2 mM MgCl<sub>2</sub>, 0.5% (w/v) *n*-dodecyl-β-D-  
599 maltopyranoside (DDM, Anatrace), 0.1% (w/v) cholesteryl hemisuccinate (CHS, Sigma), 50  
600 μM gastrin-17 and 25 mU/ml apyrase, while the CCK<sub>B</sub>R-gastrin-17-G<sub>i2</sub> complex was  
601 extracted from the membrane using a buffer containing 50 mM HEPES, pH 7.5, 300 mM NaCl,  
602 2 mM MgCl<sub>2</sub>, 0.5% (w/v) lauryl maltoseneopentyl glycol (LMNG, Anatrace), 0.05% (w/v)  
603 CHS, 50 μM gastrin-17 and 25 mU/ml apyrase. Both complexes were incubated at 4 °C for 3  
604 h and the supernatants isolated by ultra-centrifugation at 100,000 g for 30 min, followed by  
605 incubation with pre-equilibrated Strep-Tactin Sepharose (IBA Lifesciences) at 4 °C overnight.

606 The resin with the immobilized CCK<sub>B</sub>R-gastrin-17-G<sub>q</sub> complex was washed with 20  
607 column volumes of washing buffer containing 25 mM HEPES, pH 7.5, 150 mM NaCl, 0.05%  
608 (w/v) DDM, 0.01% (w/v) CHS and 50 μM gastrin-17, while the resin with the immobilized  
609 CCK<sub>B</sub>R-gastrin-17-G<sub>i2</sub> complex was washed with 20 column volumes of washing buffer  
610 containing 25 mM HEPES, pH 7.5, 150 mM NaCl, 0.01% (w/v) LMNG, 0.001% (w/v) CHS  
611 and 50 μM gastrin-17. Then, both complexes were subjected to the same purification protocol.  
612 The detergent was exchanged on resin with 10 column volumes of a buffer containing 25 mM  
613 HEPES, pH 7.5, 150 mM NaCl, 0.25% (w/v) glyco-diosgenin (GDN, Anatrace) and 50 μM  
614 gastrin-17 at 4 °C for 2 h. The resin was further washed with 20 column volumes of a buffer  
615 containing 25 mM HEPES, pH 7.5, 150 mM NaCl, 0.01% (w/v) GDN and 50 μM gastrin-17.  
616 The protein was then eluted with 5 column volumes of elute buffer containing 200 mM Tris-  
617 HCl, 500 mM NaCl, 0.01% GDN, 50 mM biotin and 50 μM gastrin-17. Purified complex was  
618 stabilized with addition of a 1.5 molar excess of scFv16 (preparation protocol shown as below)

619 and incubated at 4 °C for 2 h. The complex protein was further purified by size exclusion  
620 chromatography on a Superdex 200 Increase 10/300 column (GE Healthcare) pre-equilibrated  
621 with 20 mM HEPES, pH 7.5, 150 mM NaCl, 0.01% (w/v) GDN (to remove uncoupled  
622 receptor), excess gastrin-17 and scFv16. The monomeric complex peak was collected and  
623 concentrated to ~5 mg/ml with a 100 kDa cut-off concentrator (Millipore), and then analyzed  
624 by SDS-PAGE and analytical size-exclusion chromatography.

### 625 **Expression and purification of scFv16**

626 ScFv16 was expressed in High Five cells as a secreted protein using the baculovirus infection  
627 system. The culture medium with secreted scFv16 was harvested 48 h after infection and the  
628 protein was purified by affinity chromatography and size exclusion chromatography as  
629 previously described<sup>43</sup>. Briefly, the cell culture supernatant was pH balanced with addition of  
630 20 mM Tris-HCl, pH 8.0 and the chelating agents was removed by adding 1 mM nickel chloride  
631 and 5 mM calcium chloride followed by incubation at 20 °C for 1 h. Precipitates were removed  
632 by ultra-centrifugation at 100,000 g for 30 min and the supernatant was incubated with TALON  
633 resin at 4 °C overnight. The resin was washed with 20 column volumes of washing buffer I  
634 containing 20 mM HEPES, pH 7.5, 500 mM NaCl and 10 mM imidazole, and then was further  
635 washed with 20 column volumes of washing buffer II containing 20 mM HEPES, pH 7.5, 100  
636 mM NaCl and 10 mM imidazole. The protein was eluted in elution buffer containing 20 mM  
637 HEPES, pH 7.5, 100 mM NaCl and 250 mM imidazole. Imidazole was removed using PD  
638 MiniTrap G-25 column (GE Healthcare). The protein was then treated with His-tagged  
639 PreScission protease to remove the C-terminal 8 × His tag at 4 °C overnight. Cleaved protein  
640 was further purified by reloading into Ni-NTA resin (QIAGEN). The flow through was  
641 collected, concentrated to ~3 mg/ml with a 10 kDa cut-off concentrator (Millipore), flash-  
642 frozen by liquid nitrogen and stored at -80 °C until use.

### 643 **Cryo-EM data acquisition and processing**

644 Negative staining EM was used to confirm the formation of the CCK<sub>B</sub>R–gastrin-17–G<sub>q</sub>/G<sub>i2</sub>  
645 complexes. The protein quality of the complexes was evaluated by 200 kV cryo-EM. For 300  
646 kV cryo-EM, 3 µl of protein sample (5 mg/ml) was applied to glow-discharged 300 mesh gold  
647 grids (CryoMatrix M024-Au300-R12/13) and vitrified using a FEI Vitrobot Mark IV  
648 (ThermoFisher Scientific), at 4 °C and 100% humidity with blot time of 1 s and blot force of 0  
649 followed by flash-frozen in liquid ethane. Images were collected using a Titan Krios electron  
650 microscope operated at 300 kV with a K3 Summit direct electron detector (Gatan) at a nominal  
651 magnification of × 81,000, corresponding to a pixel size of 1.045 Å. The slit width for zero  
652 loss peak was 20 eV. Defocus values are ranged from -0.8 µm to -1.5 µm. Each movie  
653 comprises 40 frames in a total of 3 s with 0.075 s exposure per frame, and the total dose is 70  
654 electrons per Å<sup>2</sup>. Automated single-particle data acquisition was performed with SerialEM<sup>47</sup>.

655 Collected images of the CCK<sub>B</sub>R–gastrin-17–G<sub>q</sub>/G<sub>i2</sub> complex samples were subjected to  
656 beam-induced motion correction using MotionCor2. Contrast transfer function (CTF)  
657 parameters for each image were determined by Gctf v1.18<sup>48</sup>. Guided by a template generated  
658 from initial auto-picking, the particles were extracted by auto-picking using both RELION3.1<sup>49</sup>  
659 and Gautomatch v0.56 (developed by K. Zhang, MRC Laboratory of Molecular Biology,  
660 Cambridge, UK, <http://www.mrc-lmb.cam.ac.uk/kzhang/Gautomatch/>). 2D classification, 3D  
661 classification, 3D auto-refinement, Bayesian polishing and CTF refinement were performed  
662 using RELION3.1. The resolutions of density maps were calculated by the gold-standard  
663 Fourier Shell Correlation (FSC) using the 0.143 criterion. Local resolution estimation was  
664 determined by ResMap v1.1.4.

665 For the CCK<sub>B</sub>R–gastrin-17–G<sub>q</sub> complex, a total of 5,625 images were collected, followed  
666 by beam-induced motion correction and CTF determination. All 3,632,729 particles were  
667 subjected to two rounds of reference-free 2D classification to discard false positive particles.  
668 An ab initio model generated by RELION3.1 was used as initial reference model for 3D

669 classification. A subset of 418,664 particles were selected for another round of 3D  
670 classification that focused the alignment on the complex. The best-looking dataset of 354,647  
671 particles were subjected to 3D auto-refinement, resulting in an initial 3.7 Å density map. A  
672 final 3.1 Å map was sharpened by postprocess with a B-factor of  $-75 \text{ \AA}^2$ .

673 For the CCK<sub>B</sub>R–gastrin-17–G<sub>i2</sub> complex, two datasets (6,471 images and 5,072 images)  
674 were collected and each dataset was individually subjected to beam-induced motion correction,  
675 CTF determination, auto-picking, 2D classification, 3D classification and 3D auto-refinement,  
676 resulting in initial 4.1 Å and 4.0 Å density maps, respectively. After separate Bayesian  
677 polishing, the two subsets (1,067,650 particles and 270,503 particles) were combined and  
678 subjected to another round of 3D auto-refinement. CTF refinement and postprocess with a B-  
679 factor of  $-111 \text{ \AA}^2$  were performed subsequently and result in a final 3.3 Å map.

#### 680 **Model building and refinement**

681 The model of the CCK<sub>B</sub>R–gastrin-17–G<sub>q</sub> complex was built using the receptor from the  
682 CCK<sub>A</sub>R–NN9056 crystal structure, the G<sub>q</sub> from 25-CN-NBOH–HTR2A-mini G<sub>q</sub> cryo-EM  
683 structure (PDB: 6WHA) and YM-254890–G<sub>q</sub> crystal structure (PDB: 3AH8), and the G $\beta$ , G $\gamma$   
684 and scFv16 from glucagon–GCGR–G<sub>i</sub> cryo-EM structure (PDB: 6LML) as initial models,  
685 respectively. The model of the CCK<sub>B</sub>R–gastrin-17–G<sub>i2</sub> complex was built using the receptor  
686 from CCK<sub>A</sub>R–NN9056 crystal structure and the G protein heterotrimer from the glucagon–  
687 GCGR–G<sub>i</sub> cryo-EM structure (PDB: 6LML) as initial models. Both models were docked into  
688 the corresponding cryo-EM density map using ChimeraX v1.1<sup>50</sup>, followed by iterative manual  
689 adjustment in COOT<sup>46</sup> and real space refinement using phenix.real\_space\_refine in PHENIX<sup>45</sup>.  
690 The model statistics was validated using Molprobit. The final model of the CCK<sub>B</sub>R–gastrin-  
691 17–G<sub>i2</sub> complex contains 275 residues of CCK<sub>B</sub>R (A55–L249, L326–C405), 217 residues of  
692 G $\alpha$ <sub>i2</sub> (K10–M53, T183–F355), 306 residues of G $\beta$ <sub>1</sub> (N35–N340), 33 residues of G $\gamma$ <sub>2</sub> (K29–F61)  
693 and 17 residues of gastrin-17. For the CCK<sub>B</sub>R–gastrin-17–G<sub>q</sub> complex, the final model contains

694 275 residues of CCK<sub>B</sub>R (A55–L249, L326–C405), 224 residues of Gα<sub>q</sub> (A7–G58, G182–  
695 V353), 306 residues of Gβ<sub>1</sub> (N35–N340), 33 residues of Gγ<sub>2</sub> (K29–F61), 232 residues of  
696 antibody scFv16 (V19–S138, S153–L264), and 17 residues of gastrin-17. For both models, the  
697 remaining N- and C-terminal residues of CCK2 and heterotrimeric G<sub>i</sub>/G<sub>q</sub> are disordered and  
698 were not modeled. The final refinement statistics are provided in Extended Data Table 2. The  
699 extent of any model overfitting during refinement was measured by refining the final model  
700 against one of the half-maps and by comparing the resulting map versus model FSC curves  
701 with the two half-maps and the final model.

### 702 **Radiolabeled ligand-binding assay**

703 The wild-type (WT) or mutant CCKRs were transiently transfected into HEK 293T cells  
704 (purchased from the Cell Bank at the Chinese Academy of Sciences) which were cultured in  
705 poly-D-lysine coated 96-well plates. Twenty-four hours later, the cells were washed twice and  
706 incubated with blocking buffer (DMEM medium supplemented with 33 mM HEPES, and 0.1%  
707 (w/v) BSA, pH 7.4) for 2 h at 37 °C. After three times washes by cold-ice PBS, the cells were  
708 treated by a constant concentration of <sup>125</sup>I-CCK-8 (30 pM, PerkinElmer) plus 8 different  
709 concentrations of gastrin-17 (128 pM–10 μM) for 3 h at room temperature (RT). Cells were  
710 washed three times with ice-cold PBS and lysed by 50 μl lysis buffer (PBS supplemented with  
711 20 mM Tris-HCl and 1% (v/v) Triton X-100, pH 7.4). Subsequently, the plates were counted  
712 for radioactivity (counts per minute, CPM) in a scintillation counter (MicroBeta<sup>2</sup> plate counter,  
713 PerkinElmer) using 150 μl scintillation cocktail (OptiPhase SuperMix, PerkinElmer).

### 714 **Inositol phosphate accumulation assay**

715 Inositol phosphate accumulation was measured using an IP-One G<sub>q</sub> assay kit (Cisbio  
716 Bioassays). The WT and mutant CCKRs were cloned into pTT5 vector (Invitrogen) and  
717 transiently transfected into HEK 293F cells. After 48 h expression, the cells were plated into  
718 384-well plates (8,000 cells per well). For agonist effects, various gradient concentrations of



719 NN9056 or CCK-8 (1 pM to 10  $\mu$ M diluted in stimulation buffer) were added and incubated at  
720 37 °C for 1 h. IP1-d2 and anti-IP1 cryptate were then applied and incubated at RT for 1 h. For  
721 antagonist experiments, 1  $\mu$ M linitript or 10  $\mu$ M devazepide was introduced and incubated at  
722 37 °C for 1 h followed by addition of different concentrations of NN9056 (10 pM to 100  $\mu$ M  
723 diluted in stimulation buffer) and 1 h incubation at 37 °C. Fluorescence signals were read by  
724 Synergy H1 plate reader (Biotech) with excitation at 330 nm and emission at 620 and 665 nm.  
725 The inositol phosphate accumulation curves,  $EC_{50}$  and  $pEC_{50} \pm$  S.E.M. were calculated using  
726 nonlinear regression curve fitting in Prism 8.

### 727 **Molecular dynamics (MD) simulation**

728 To simulate the CCK<sub>A</sub>R in complex with CCK-8 in a no-fusion/no-mutation background, the  
729 crystal structure of CCK<sub>A</sub>R–NN9056 was prepared by the Protein Preparation Wizard  
730 (Schrodinger 2017-4). The initial conformation of CCK-8 with CCK<sub>A</sub>R was constructed on  
731 that of NN9056 by multiple rounds of single residue modification/mutation and energy  
732 minimization using the Protein Preparation Wizard. Residues D87<sup>2,50</sup> and E138<sup>3,49</sup> were  
733 protonated to simulate the protonation upon receptor activation while all other titratable  
734 residues were left in their dominant protonation state at pH 7.0. The complexes were embedded  
735 in a bilayer composed of 148 POPC lipids and solvated with 0.15 M NaCl in explicitly  
736 represented water using CHARMM-GUI Membrane Builder<sup>51</sup>. The CHARMM36-CAMP  
737 force field was adopted for protein, peptides, lipids and salt ions, while the CHARMM TIP3P  
738 model was chosen for water. Parameters for the sulfated tyrosine was generated using the  
739 CHARMM General Force Field (CGenFF), program version 1.0.0. MD simulations were  
740 performed by Gromacs 2018.5. The Particle Mesh Ewald (PME) method was used to treat all  
741 electrostatic interactions beyond a cutoff of 10 Å and the bonds involving hydrogen atoms were  
742 constrained using LINCS algorithm. The constructed system was firstly relaxed using the  
743 steepest descent energy minimization, followed by slow heating of the system to 310 K with

744 restraints. The restraints were reduced gradually over 18 ns, with a simulation step of 1 fs.  
745 Finally, the system was run without restraints, with a time step of 2 fs in the NPT ensemble at  
746 310 K and 1 bar using the v-rescale thermostat and the semi-isotropic Parrinello-Rahman  
747 barostat, respectively. For each system, four independent 500 ns production simulations were  
748 performed, and trajectory were saved every 50 ps.

749

## 750 **Data availability**

751 Atomic coordinates for the structures of CCK<sub>A</sub>R-lintitript, CCK<sub>A</sub>R-devazepide and CCK<sub>A</sub>R-  
752 NN9056 have been deposited in the RCSB PDB under accession codes #####, ##### and #####.

753 Atomic coordinates and cryo-EM density maps for the structures of inactive CCK<sub>B</sub>R-gastrin-  
754 G<sub>i</sub> and CCK<sub>B</sub>R-gastrin-G<sub>q</sub> have been deposited in the RCSB Protein Data Bank (PDB) under  
755 accession codes ##### and #####, and the Electron Microscopy Data Bank (EMDB) under  
756 accession codes EMD-##### and EMD-#####.

## 757 **References**

- 758 42. Maeda, S. *et al.* Development of an antibody fragment that stabilizes GPCR/G-protein  
759 complexes. *Nature Communications* **9** (2018).  
760 43. Kabsch, W. Xds. *Acta Crystallogr D Biol Crystallogr* **66**, 125-132 (2010).  
761 44. McCoy, A.J. *et al.* Phaser crystallographic software. *J Appl Crystallogr* **40**, 658-674  
762 (2007).  
763 45. Adams, P.D. *et al.* The Phenix software for automated determination of macromolecular  
764 structures. *Methods* **55**, 94-106 (2011).  
765 46. Emsley, P. & Cowtan, K. Coot: model-building tools for molecular graphics. *Acta*  
766 *Crystallogr D Biol Crystallogr* **60**, 2126-2132 (2004).  
767 47. Mastrorade, D.N. Automated electron microscope tomography using robust prediction  
768 of specimen movements. *Journal of Structural Biology* **152**, 36-51 (2005).  
769 48. Zhang, K. Gctf: Real-time CTF determination and correction. *J Struct Biol* **193**, 1-12  
770 (2016).  
771 49. Zivanov, J. *et al.* New tools for automated high-resolution cryo-EM structure  
772 determination in RELION-3. *Elife* **7** (2018).  
773 50. Goddard, T.D. *et al.* UCSF ChimeraX: Meeting modern challenges in visualization and  
774 analysis. *Protein Science* **27**, 14-25 (2018).  
775 51. Lee, J. *et al.* CHARMM-GUI Input Generator for NAMD, GROMACS, AMBER,  
776 OpenMM, and CHARMM/OpenMM Simulations Using the CHARMM36 Additive  
777 Force Field. *J Chem Theory Comput* **12**, 405-413 (2016).  
778

779 **Acknowledgements**

780 This work was partially supported by the National Key R&D Programs of China  
781 2018YFA0507000 (H.X.X., S.Z., M.-W.W., B.W. and Q.Zhao); the National Science  
782 Foundation of China grants 21704064 (Q.Z.), 81773792 and 81973373 (D.Y.), 31800621  
783 (S.H.), 31770796 (Y.J.), 31971178 (S.Z.), 81872915 and 82073904 (M.-W.W.), 31825010  
784 (B.W.) and 81525024 (Q.Zhao); National Science and Technology Major Project of China –  
785 Key New Drug Creation and Manufacturing Program 2018ZX09735–001 (M.-W.W.) and  
786 2018ZX09711002–002–005 (D.Y.); and CAS Strategic Priority Research Program  
787 XDB37000000 (B.W.). The synchrotron radiation experiments were performed at the BL41XU  
788 of SPring-8 with approval of the Japan Synchrotron Radiation Research Institute (Proposal no.  
789 2019A2543, 2019B2543, 2019A2541 and 2019B2541). We thank the beamline staff members  
790 K. Hasegawa, N. Mizuno, T. Kawamura, and H. Murakami of the BL41XU for help with X-  
791 ray data collection. The cryo-EM data were collected at the Cryo-Electron Microscopy  
792 Research Center, Shanghai Institute of Materia Medica (SIMM). The authors thank the staff at  
793 the SIMM Cryo-Electron Microscopy Research Center for their technical support.

794 **Author contributions**

795 X.Z. optimized the construct, purified the CCK<sub>AR</sub> protein, performed crystallization trials,  
796 solved the structure, performed signaling assays, and helped manuscript preparation. C.H.  
797 optimized the construct, purified the CCK<sub>BR</sub> protein, performed crystallization trials, solved  
798 the structure, performed signaling assays, and helped manuscript preparation. M.W. processed  
799 the cryo-EM data and solved the structures of CCK<sub>BR</sub>. D.Y., W.F., A.D. and J.W. designed  
800 and performed the receptor binding and functional assays. Q.Z. performed molecular  
801 dynamics simulation and docking studies, and helped manuscript preparation. Y.Z. helped  
802 signaling assay design and manuscript preparation. H.Z. collected X-ray diffraction data. X.C.

803 helped protein expression. Z.Y. participated in manuscript preparation. Y.J. solved the cryo-  
804 EM structures of CCK<sub>A</sub>R–G protein complexes. U.S. designed and synthesized the ligands.  
805 Q.T. assisted in the cryo-EM data collection. S.H. helped structure determination. S.R. helped  
806 ligand selection and data analysis. H.E.X. helped analysis of cryo-EM structures of CCK<sub>A</sub>R–  
807 G protein complexes and manuscript preparation. S.Z. oversaw molecular dynamics simulation  
808 and docking studies, and edited the manuscript. M.-W.W. oversaw the binding and signaling  
809 assays, and edited the manuscript. B.W. and Q.Zhao initiated the project, planned and  
810 supervised the research, and wrote the manuscript with inputs from all co-authors.

### 811 **Competing Interests statement**

812 The authors declare no competing interests.

813 **Correspondence and requests for materials** should be addressed to S.Z., M.-W.W., B.W.  
814 and Q.Z.

815

## Extended Data Figures

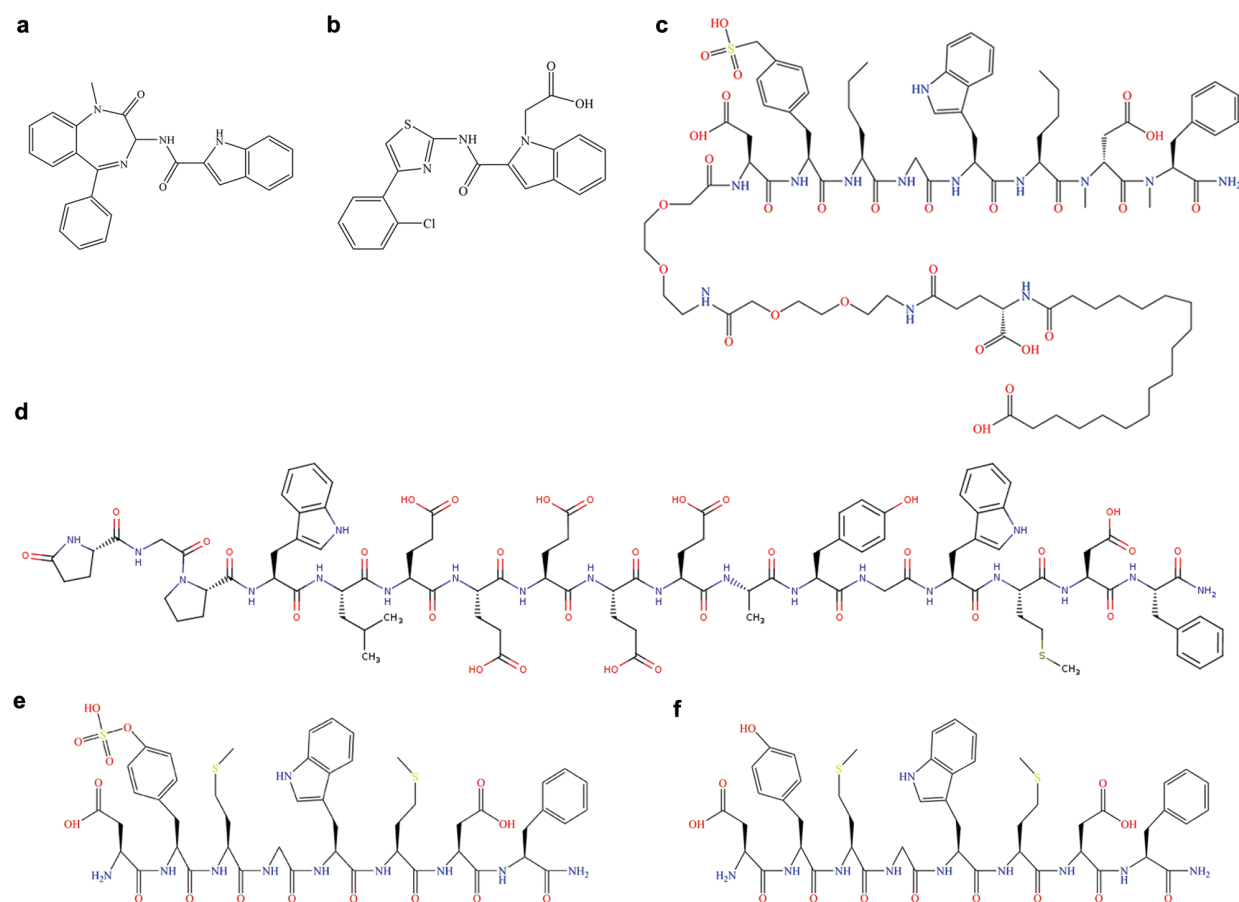

816

817 **Extended Data Fig. 1 | Structures of the ligands in the CCK<sub>A</sub>R and CCK<sub>B</sub>R complexes**

818 **and molecular dynamic simulations. a, Devazepide. b, Lintript. c, NN9056. d, Gastrin-17.**

819 **e, CCK-8. f, CCK-8ns.**

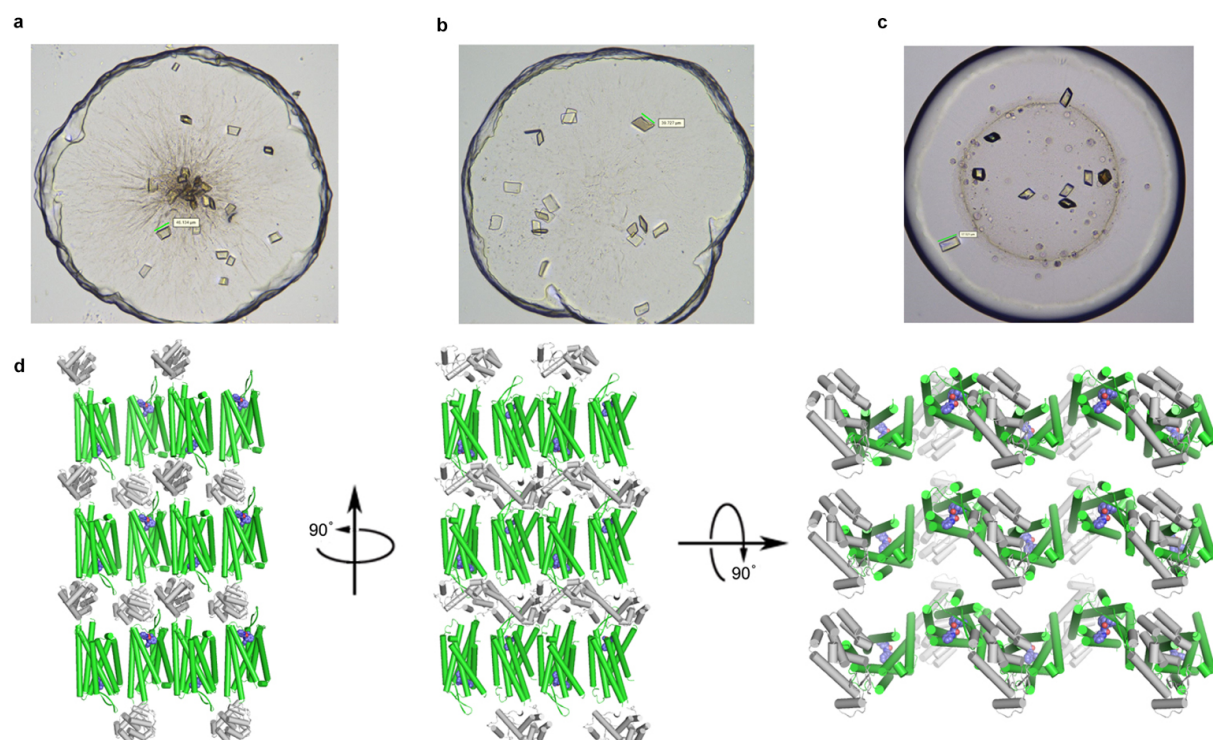

820

821 **Extended Data Fig. 2 | CCK<sub>A</sub>R crystals and lattice packing.** a–c, Crystals of CCK<sub>A</sub>R–T4L  
822 in complex with devazepide (a), linitript (b) and NN9056 (c). d, Lattice packing of CCK<sub>A</sub>R–  
823 T4L–devazepide crystals with CCK<sub>A</sub>R depicted in green, T4L in grey and devazepide shown  
824 as spheres in blue. The main contacts contained nonpolar interactions among CCK<sub>A</sub>R  
825 molecules mediated by helices I and V and interactions between ECL2 and ECL3 of CCK<sub>A</sub>R  
826 and T4L. The packing patterns of CCK<sub>A</sub>R–T4L–linitript and CCK<sub>A</sub>R–T4L–NN9056 are same  
827 as CCK<sub>A</sub>R–T4L–devazepide.

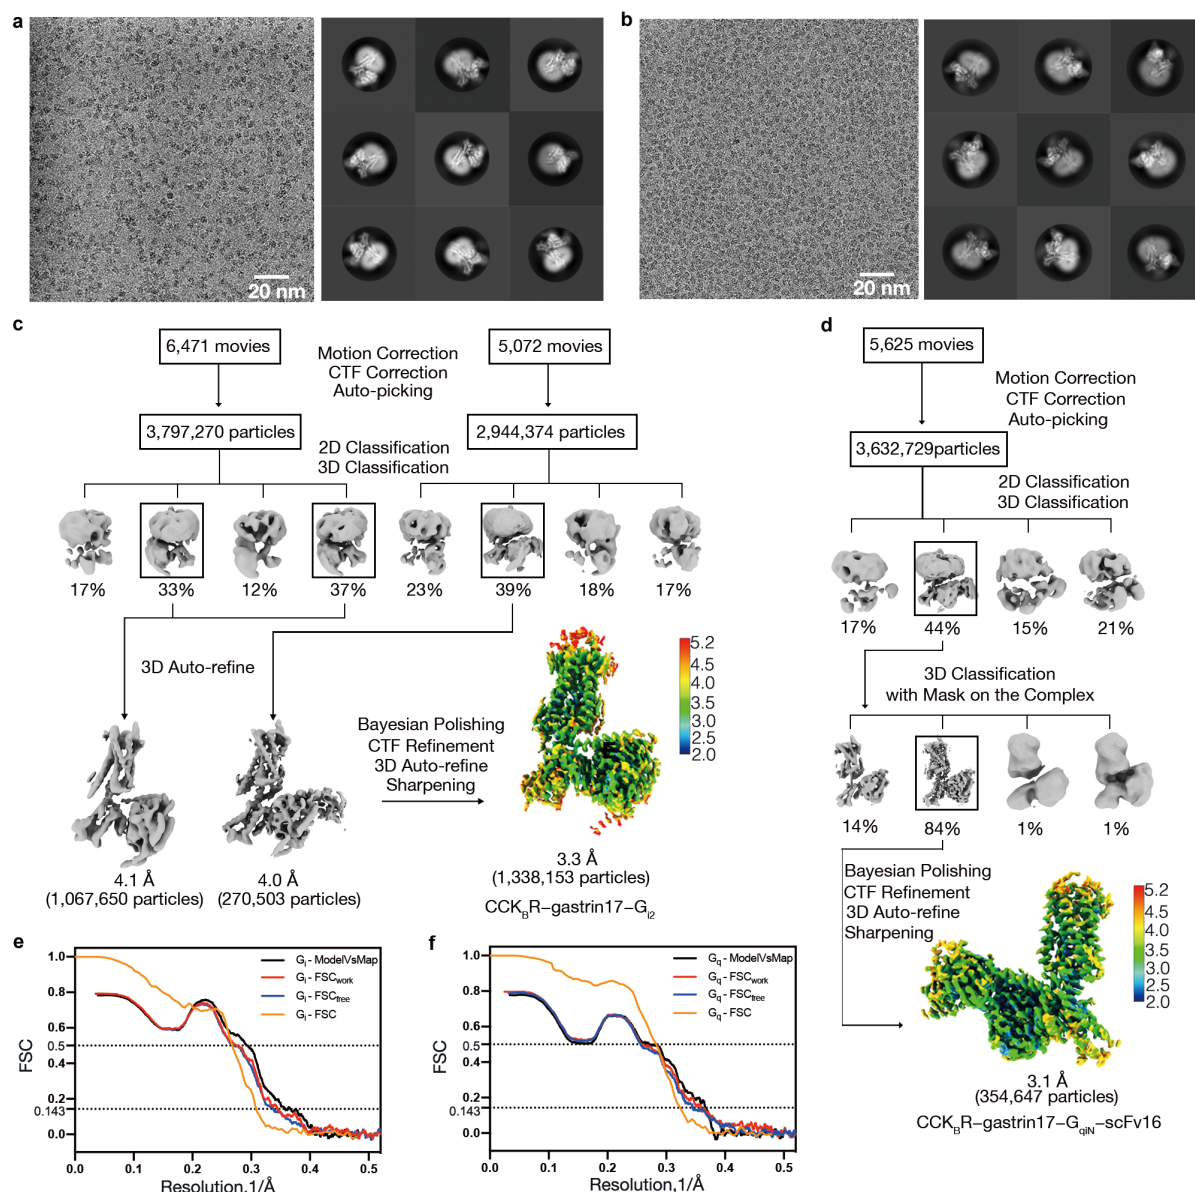

**Extended Data Fig. 3 | Cryo-EM data processing of the CCK<sub>B</sub>R-gastrin-17-G<sub>12</sub> and**

**CCK<sub>B</sub>R-gastrin-17-G<sub>q</sub> complexes.** **a**, Representative cryo-EM image and 2D averages of the

CCK<sub>B</sub>R-gastrin-17-G<sub>12</sub> complex. **b**, Representative cryo-EM image and 2D averages of

CCK<sub>B</sub>R-gastrin-17-G<sub>q</sub> complex. **c**, Workflow of cryo-EM data processing with cryo-EM map

colored according to local resolution (Å) for the CCK<sub>B</sub>R-gastrin-17-G<sub>12</sub> complex. **d**, Workflow

of cryo-EM data processing with cryo-EM map colored according to local resolution (Å) for

the CCK<sub>B</sub>R-gastrin-17-G<sub>q</sub> complex. **e**, Gold-standard FSC curve and cross-validation of

model to cryo-EM density map of CCK<sub>B</sub>R-gastrin-17-G<sub>12</sub>. FSC curves for the final model

versus the final map, FSCwork curve, FSCfree curve and FSC curves are shown in black, red,

838 blue and orange, respectively. **f**, Gold-standard FSC curve and cross-validation of model to  
839 cryo-EM density map of CCK<sub>B</sub>R–gastrin-17–G<sub>qiN</sub>.

840



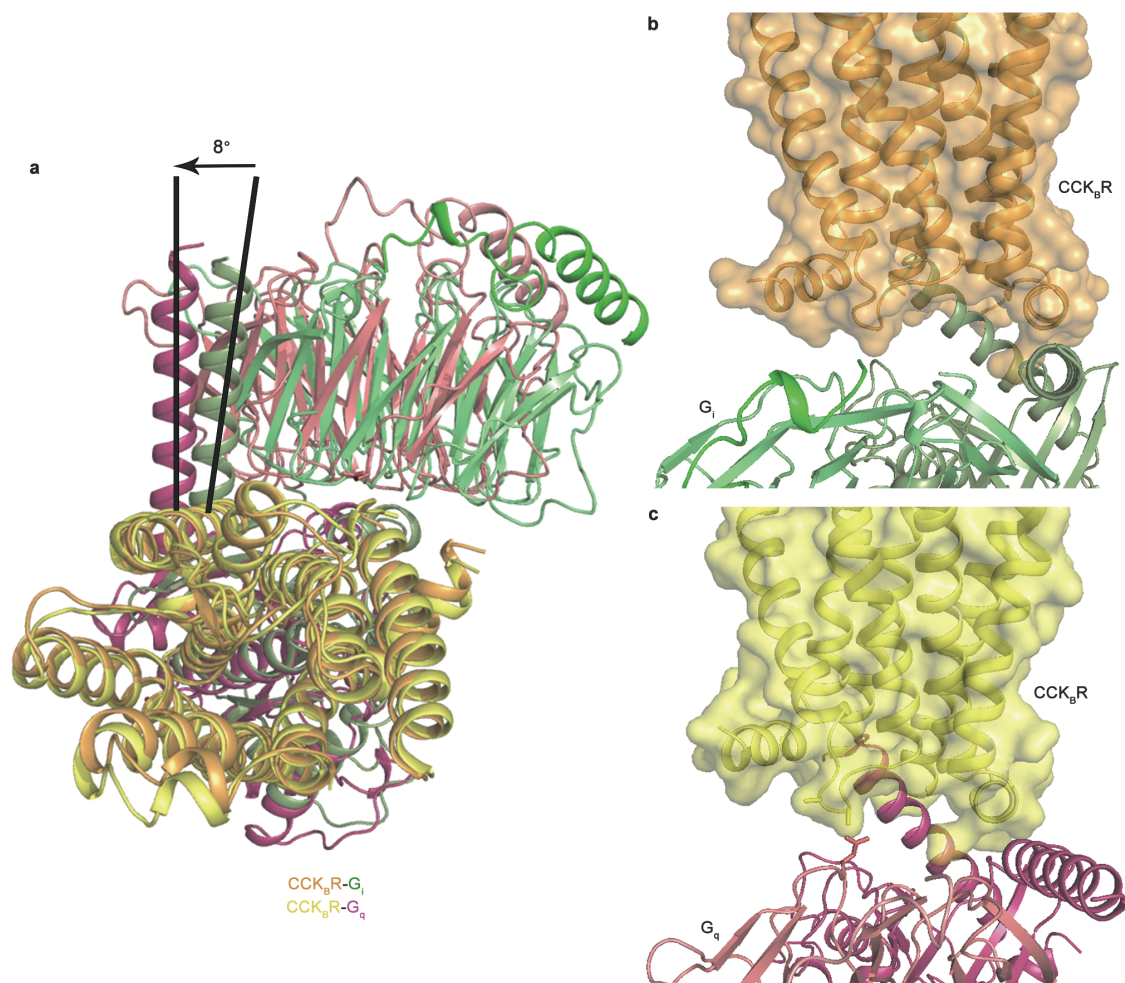

841  
842

**Extended Data Fig. 4 | G<sub>12</sub> and G<sub>q</sub> binding comparison in the CCK<sub>B</sub>R–gastrin-17**

843

**complexes. a,** Superposition of the gastrin-17–CCK<sub>B</sub>R–G<sub>12</sub> and gastrin-17–CCK<sub>B</sub>R–G<sub>q</sub>

844

complex structures. The structures are aligned based on receptor region. The CCK<sub>B</sub>R are shown

845

in wheat and light orange cartoons for G<sub>12</sub> and G<sub>q</sub> complexes. The G<sub>12</sub> trimers are shown in

846

blue, slate and light blue cartoons, and the G<sub>q</sub> trimers are shown in yellow, light yellow and

847

limon cartoons, respectively. Side view of G<sub>12</sub> (b) and G<sub>q</sub> (c) binding to the receptor from the

848

same angle. The structures are colored according to panel (a).

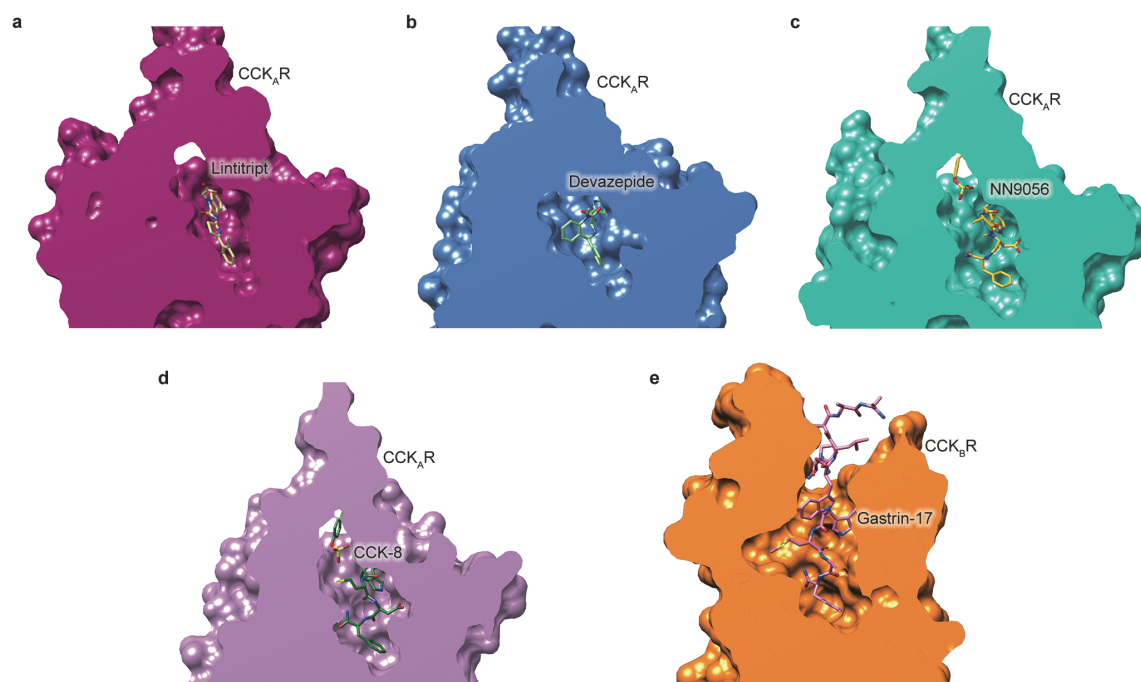

849

850 **Extended Data Fig. 5 | Cut-view of orthosteric sites of CCK<sub>A</sub>R and CCK<sub>B</sub>R. a, CCK<sub>A</sub>R–**

851 lintitript. **b, CCK<sub>A</sub>R–devazepide. c, CCK<sub>A</sub>R–NN9056. d, CCK<sub>A</sub>R–CCK-8. e, CCK<sub>B</sub>R–gastrin-**

852 **17.**

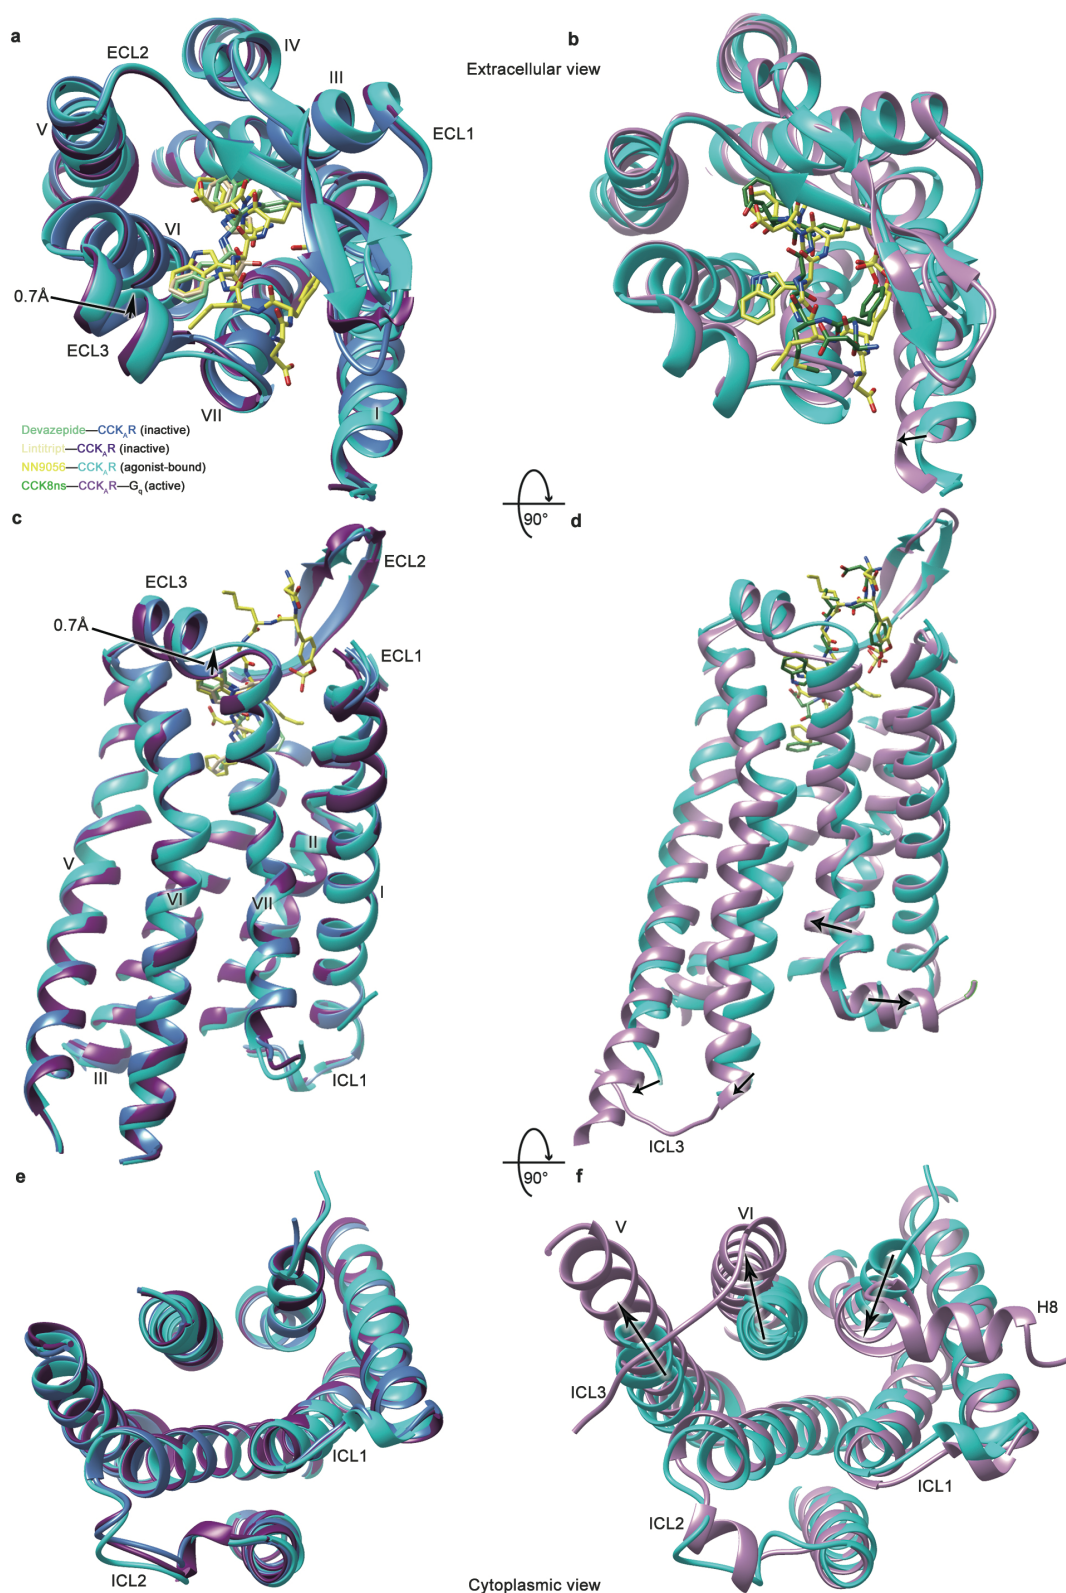

853

854

**Extended Data Fig. 6 | Comparison of the CCK<sub>A</sub>R structures.** Extracellular (top), side

855

(middle) and intracellular (bottom) views of agonist NN9056-bound (violet), antagonist-bound

856

(lime green for devazepide or pale green for lintitript), and both agonist and G protein bound

857 (orange) CCK<sub>A</sub>R structures. G proteins are omitted for clarity. Conformational changes are  
858 indicated with black arrows.  
859

860  
861

**Extended Data Table 1 | X-ray data collection and refinement statistics of the CCK<sub>A</sub>R–devazepide, CCK<sub>A</sub>R–lontitript and CCK<sub>A</sub>R–NN9056 complex structures**

|                                                         | CCK <sub>A</sub> R–devazepide <sup>a</sup> | CCK <sub>A</sub> R–lontitript <sup>b</sup> | CCK <sub>A</sub> R–NN9056 <sup>c</sup> |
|---------------------------------------------------------|--------------------------------------------|--------------------------------------------|----------------------------------------|
| <b>Data collection</b>                                  |                                            |                                            |                                        |
| Space group                                             | <i>P2<sub>1</sub></i>                      | <i>P2<sub>1</sub></i>                      | <i>P2<sub>1</sub></i>                  |
| Cell dimensions                                         |                                            |                                            |                                        |
| a, b, c (Å)                                             | 54.8, 72.4, 86.1                           | 54.4, 72.0, 86.0                           | 56.6, 72.5, 87.9                       |
| α, β, γ (°)                                             | 90.0, 107.3, 90.0                          | 90.0, 106.1, 90.0                          | 90.0, 100.5, 90.0                      |
| Resolution (Å)                                          | 29.8-2.5 (2.64-2.50)                       | 29.6-2.8 (2.95-2.80)                       | 29.5-3.0 (3.16-3.00)                   |
| <i>R</i> <sub>merge</sub> (%)                           | 18.1 (89.2)                                | 19.0 (70.3)                                | 20.6 (57.3)                            |
| Mean <i>I</i> /σ <i>I</i>                               | 5.0 (1.1)                                  | 5.2 (1.1)                                  | 4.5 (1.0)                              |
| Completeness (%)                                        | 98.2 (99.1)                                | 97.5 (96.7)                                | 97.1 (96.7)                            |
| Redundancy                                              | 4.8 (4.6)                                  | 4.1 (3.9)                                  | 4.4 (4.2)                              |
| <b>Refinement</b>                                       |                                            |                                            |                                        |
| Resolution (Å)                                          | 29.8-2.5                                   | 29.6-2.8                                   | 29.5-3.0                               |
| No. reflections                                         | 22,038 (1,618)                             | 15,523 (1,158)                             | 26,470 (1,931)                         |
| <i>R</i> <sub>work</sub> / <i>R</i> <sub>free</sub> (%) | 0.209 / 0.264                              | 0.234 / 0.250                              | 0.216 / 0.265                          |
| No. atoms                                               |                                            |                                            |                                        |
| Protein                                                 | 3,439                                      | 3,453                                      | 3,488                                  |
| Ligand/ion                                              | 31                                         | 28                                         | 80                                     |
| Average B-factors (Å <sup>2</sup> )                     |                                            |                                            |                                        |
| Protein                                                 | 81.6                                       | 91.3                                       | 113.9                                  |
| Ligand                                                  | 69.2                                       | 79.7                                       | 102                                    |
| R.m.s. deviations                                       |                                            |                                            |                                        |
| Bond lengths (Å)                                        | 0.008                                      | 0.010                                      | 0.008                                  |
| Bond angles (°)                                         | 1.09                                       | 1.29                                       | 1.46                                   |

862  
863  
864  
865

<sup>a</sup>17 crystals were used for structure determination. Values in parentheses are for highest-resolution shell.

<sup>b</sup>34 crystals were used for structure determination. Values in parentheses are for highest-resolution shell.

<sup>c</sup>44 crystals were used for structure determination. Values in parentheses are for highest-resolution shell.

866  
867

**Extended Data Table 2 | Cryo-EM data collection and refinement statistics of the gastrin-17-CCK<sub>B</sub>R-G<sub>i2</sub> and gastrin-17-CCK<sub>B</sub>R-G<sub>q</sub> complex structures**

|                                                     | CCK <sub>B</sub> R-gastrin-17-G <sub>i2</sub> | CCK <sub>B</sub> R-gastrin-17-G <sub>q</sub> |
|-----------------------------------------------------|-----------------------------------------------|----------------------------------------------|
| <b>Data collection and processing</b>               |                                               |                                              |
| Magnification                                       | 81,000                                        | 81,000                                       |
| Voltage (kV)                                        | 300                                           | 300                                          |
| Electron exposure (e <sup>-</sup> /Å <sup>2</sup> ) | 70                                            | 70                                           |
| Defocus range (μm)                                  | -0.8 ~ -1.5                                   | -0.8 ~ -1.5                                  |
| Pixel size (Å)                                      | 1.045                                         | 1.045                                        |
| Symmetry imposed                                    | C1                                            | C1                                           |
| Initial particle projections (no.)                  | 6,741,644                                     | 3,632,729                                    |
| Final particle projections (no.)                    | 1,338,153                                     | 354,647                                      |
| Map resolution (Å)                                  | 3.3                                           | 3.1                                          |
| FSC threshold                                       | 0.143                                         | 0.143                                        |
| Map resolution range (Å)                            | 2.5–5.0                                       | 2.5–5.0                                      |
| <b>Refinement</b>                                   |                                               |                                              |
| Initial model used (PDB code)                       | CCK <sub>A</sub> R-NN9056*                    | CCK <sub>A</sub> R-NN9056*                   |
|                                                     | 6LML                                          | 6WHA,3AH8,6LML                               |
| Model resolution (Å)                                | 3.4                                           | 3.6                                          |
| FSC threshold                                       | 0.5                                           | 0.5                                          |
| Map sharpening B factor (Å <sup>2</sup> )           | -111                                          | -75                                          |
| Model composition                                   |                                               |                                              |
| Non-hydrogen atoms                                  | 6601                                          | 8486                                         |
| Protein residues                                    | 848 (6601 atoms)                              | 1087 (8486 atoms)                            |
| Receptor residues                                   | 275 (2128 atoms)                              | 275 (2128 atoms)                             |
| G protein residues                                  | 556 (4340 atoms)                              | 563 (4442 atoms)                             |
| Antibody residues                                   | --                                            | 232 (1783 atoms)                             |
| Ligand residues                                     | 17 (133 atoms)                                | 17 (133 atoms)                               |
| B factors (Å <sup>2</sup> )                         |                                               |                                              |
| Protein                                             | 57.08                                         | 62.02                                        |
| Ligand                                              | 87.27                                         | 109.52                                       |
| R.m.s. deviations                                   |                                               |                                              |
| Bond lengths (Å)                                    | 0.006                                         | 0.009                                        |
| Bond angles (°)                                     | 0.986                                         | 1.589                                        |
| Validation                                          |                                               |                                              |
| MolProbity score                                    | 1.63                                          | 1.74                                         |
| Clashscore                                          | 7.36                                          | 8.93                                         |
| Rotamer outliers (%)                                | 0.00                                          | 0.00                                         |
| Ramachandran plot                                   |                                               |                                              |
| Favored (%)                                         | 96.52                                         | 96.16                                        |
| Allowed (%)                                         | 3.48                                          | 3.84                                         |
| Disallowed (%)                                      | 0.00                                          | 0.00                                         |

868

869  
870

**Extended Data Table 3 | Effects of devazepide and lintitript on IP1 accumulation in wild-type and mutant CCK<sub>A</sub>Rs**

| Mutant                 | NN9056                | NN9056/devazepide <sup>a</sup> |                    | NN9056/lintitript <sup>a</sup> |                    | Expression <sup>c</sup><br>(% of WT) |
|------------------------|-----------------------|--------------------------------|--------------------|--------------------------------|--------------------|--------------------------------------|
|                        | EC <sub>50</sub> (nM) | EC <sub>50</sub> (nM)          | Ratio <sup>b</sup> | EC <sub>50</sub> (nM)          | Ratio <sup>b</sup> |                                      |
| Wild-type              | 13                    | 1,235                          | 98                 | 770                            | 61                 | 100                                  |
| N98 <sup>2.61</sup> A  | 28                    | 10,060                         | 359                | / <sup>d</sup>                 | /                  | 222 ± 8                              |
| T117 <sup>3.28</sup> A | 24                    | 982                            | 41                 | / <sup>d</sup>                 | /                  | 97 ± 6                               |
| M121 <sup>3.32</sup> A | 28                    | 2,219                          | 79                 | 577                            | 21                 | 149 ± 8                              |
| Y176 <sup>4.60</sup> A | 5.3                   | 1,942                          | 366                | 602                            | 116                | 41 ± 3                               |
| F330 <sup>6.52</sup> A | 5.4                   | 198                            | 37                 | 393                            | 73                 | 43 ± 4                               |
| N333 <sup>6.55</sup> A | 8.7                   | 324                            | 37                 | 84                             | 10                 | 123 ± 20                             |
| R336 <sup>6.58</sup> A | 19                    | 710                            | 37                 | 151                            | 8                  | 139 ± 7                              |
| L347 <sup>7.30</sup> A | 26                    | 2,090                          | 80                 | 280                            | 11                 | 49 ± 8                               |
| I352 <sup>7.35</sup> A | 10                    | 816                            | 82                 | 289                            | 29                 | 134 ± 18                             |

871  
872  
873  
874  
875  
876  
877  
878  
879  
880  
881

<sup>a</sup>EC<sub>50</sub> values were determined after 1 h stimulation with increasing concentrations of NN9056 together with 10 μM devazepide or 1 μM lintitript. All values are performed at least three independent experiments performed in triplicate.

<sup>b</sup>The EC<sub>50</sub> ratio represents the shift between NN9056 and NN9056 plus antagonist curve ( $EC_{50(NN9056+antagonist)}/EC_{50(NN9056)}$ ) and characterizes the antagonistic effect. A reduced EC<sub>50</sub> ratio of mutant compared to the wild-type receptor was interpreted as important of the respective antagonist.

<sup>c</sup>Protein expression levels of CCK<sub>A</sub>R constructs at the cell surface were determined in parallel by flow cytometry with an anti-FLAG antibody and reported as percent compared to the WT CCK<sub>A</sub>R from at least three independent measurements performed in duplicate.

<sup>d</sup>The EC<sub>50</sub> was not measured due to lack of interaction in the structure.

882  
883

**Extended Data Table 4 | Binding of devazepide and lintitript to wild-type (WT) and mutant CCK<sub>A</sub>Rs in competition with <sup>125</sup>I-CCK-8**

| Mutant                 | Devazepide               |                                            |                             | Lintitript               |                               |                | N <sup>c</sup> |
|------------------------|--------------------------|--------------------------------------------|-----------------------------|--------------------------|-------------------------------|----------------|----------------|
|                        | IC <sub>50</sub><br>(nM) | pIC <sub>50</sub> ±<br>S.E.M. <sup>a</sup> | Span<br>(% WT) <sup>b</sup> | IC <sub>50</sub><br>(nM) | pIC <sub>50</sub> ±<br>S.E.M. | Span<br>(% WT) |                |
| Wild-type              | 17.0                     | 7.77 ±<br>0.09                             | 100                         | 14.2                     | 7.85 ± 0.07                   | 100            | 3              |
| N98 <sup>2.61</sup> A  | 17.0                     | 7.77 ±<br>0.08                             | 66 ± 2                      | / <sup>d</sup>           | /                             | /              | 3              |
| T117 <sup>3.28</sup> A | 18.6                     | 7.73 ±<br>0.09                             | 147 ± 6                     | /                        | /                             | /              | 3              |
| T118 <sup>3.29</sup> A | 13.1                     | 7.88 ±<br>0.07                             | 105 ± 3                     | /                        | /                             | /              | 3              |
| M121 <sup>3.32</sup> A | 18.6                     | 7.73 ±<br>0.10                             | 175 ± 8                     | 190.0                    | 6.72 ± 0.07                   | 160 ± 6        | 3              |
| Y176 <sup>4.60</sup> A | n.a. <sup>e</sup>        | n.a.                                       | n.a.                        | n.a.                     | n.a.                          | n.a.           | 3              |
| F330 <sup>6.52</sup> A | 4.4                      | 8.36 ±<br>0.11                             | 87 ± 4                      | 3.2                      | 8.50 ± 0.08                   | 87 ± 3         | 3              |
| N333 <sup>6.55</sup> A | n.a.                     | n.a.                                       | n.a.                        | n.a.                     | n.a.                          | n.a.           | 3              |
| R336 <sup>6.58</sup> A | n.a.                     | n.a.                                       | n.a.                        | n.a.                     | n.a.                          | n.a.           | 3              |
| A343 <sup>ECL3</sup> W | n.a.                     | n.a.                                       | n.a.                        | n.a.                     | n.a.                          | n.a.           | 3              |
| E344 <sup>ECL3</sup> A | n.a.                     | n.a.                                       | n.a.                        | n.a.                     | n.a.                          | n.a.           | 3              |
| L347 <sup>ECL3</sup> A | n.a.                     | n.a.                                       | n.a.                        | n.a.                     | n.a.                          | n.a.           | 3              |
| I352 <sup>7.35</sup> A | n.a.                     | n.a.                                       | n.a.                        | n.a.                     | n.a.                          | n.a.           | 3              |

884 <sup>a</sup>Data shown are means ± S.E.M. from at least three independent experiments performed in  
885 triplicate. Source data are provided as a Source Data file.

886 <sup>b</sup>The span is defined as the window between the maximal <sup>125</sup>I-CCK-8 response (E<sub>max</sub>) and the  
887 vehicle (no ligand).

888 <sup>c</sup>Sample size; the number of independent experiments performed in triplicate.

889 <sup>d</sup>The IC<sub>50</sub> was not measured due to lack of interaction in the structure.

890 <sup>e</sup>Cannot be calculated due to poor binding of the corresponding mutant.

891



892  
893

**Extended Data Table 5 | Effects of NN9056 and CCK-8 on IP1 accumulation in wild-type (WT) and mutant CCK<sub>A</sub>Rs**

| Mutant                 | NN9056                                |                                            |                             | CCK-8                                 |                                            |                             | Expression <sup>d</sup><br>(% of WT) |
|------------------------|---------------------------------------|--------------------------------------------|-----------------------------|---------------------------------------|--------------------------------------------|-----------------------------|--------------------------------------|
|                        | EC <sub>50</sub><br>(nM) <sup>a</sup> | pEC <sub>50</sub> ±<br>S.E.M. <sup>b</sup> | Span<br>(% WT) <sup>c</sup> | EC <sub>50</sub><br>(nM) <sup>a</sup> | pEC <sub>50</sub> ±<br>S.E.M. <sup>b</sup> | Span<br>(% WT) <sup>c</sup> |                                      |
| Wild-type              | 13                                    | 7.90 ± 0.05                                | 100                         | 4.1                                   | 8.38 ± 0.05                                | 100                         | 100                                  |
| N98 <sup>2.61</sup> A  | 28                                    | 7.56 ± 0.13                                | 66 ± 4                      | 56                                    | 7.25 ± 0.11                                | 102 ± 5                     | 222 ± 8                              |
| K105 <sup>ECL1</sup> A | 8.4                                   | 8.08 ± 0.09                                | 112 ± 4                     | 2.6                                   | 8.58 ± 0.12                                | 92 ± 4                      | 162 ± 43                             |
| T117 <sup>3.28</sup> A | 24                                    | 7.62 ± 0.11                                | 77 ± 4                      | 5.7                                   | 8.25 ± 0.12                                | 63 ± 3                      | 97 ± 6                               |
| M121 <sup>3.32</sup> A | 28                                    | 7.55 ± 0.18                                | 35 ± 3                      | 5.5                                   | 8.26 ± 0.15                                | 65 ± 4                      | 149 ± 8                              |
| M121 <sup>3.32</sup> V | 21                                    | 7.69 ± 0.60                                | 15 ± 4                      | 36                                    | 7.64 ± 0.36                                | 40 ± 6                      | 119 ± 13                             |
| M121 <sup>3.32</sup> L | 9                                     | 8.05 ± 0.46                                | 21 ± 4                      | 120                                   | 6.92 ± 0.87                                | 20 ± 8                      | 120 ± 7                              |
| M121 <sup>3.32</sup> I | 12                                    | 7.91 ± 0.18                                | 54 ± 4                      | 73                                    | 7.14 ± 0.24                                | 63 ± 7                      | 107 ± 21                             |
| Y176 <sup>4.60</sup> A | 5.3                                   | 8.28 ± 0.13                                | 67 ± 3                      | 39                                    | 7.41 ± 0.15                                | 56 ± 4                      | 41 ± 3                               |
| R197 <sup>ECL2</sup> A | 35                                    | 7.46 ± 0.10                                | 115 ± 5                     | 482                                   | 6.32 ± 0.15                                | 106 ± 8                     | 110 ± 16                             |
| W326 <sup>6.48</sup> A | 6.9                                   | 8.16 ± 0.16                                | 47 ± 3                      | 13                                    | 7.88 ± 0.23                                | 38 ± 4                      | 26 ± 4                               |
| I329 <sup>6.51</sup> A | 4.6                                   | 8.34 ± 0.13                                | 63 ± 3                      | 57                                    | 7.24 ± 0.17                                | 71 ± 5                      | 86 ± 4                               |
| F330 <sup>6.52</sup> A | 5.4                                   | 8.27 ± 0.19                                | 39 ± 3                      | 6.8                                   | 8.17 ± 0.11                                | 52 ± 2                      | 43 ± 4                               |
| N333 <sup>6.55</sup> A | 8.7                                   | 8.06 ± 0.07                                | 91 ± 3                      | 312                                   | 6.51 ± 0.09                                | 79 ± 3                      | 123 ± 20                             |
| R336 <sup>6.58</sup> A | 19                                    | 7.78 ± 0.19                                | 61 ± 5                      | 556                                   | 6.26 ± 0.19                                | 61 ± 6                      | 139 ± 7                              |
| L347 <sup>7.30</sup> A | 26                                    | 7.58 ± 0.14                                | 59 ± 3                      | 393                                   | 6.41 ± 0.12                                | 64 ± 4                      | 49 ± 8                               |
| S348 <sup>ECL3</sup> A | 8.2                                   | 8.09 ± 0.15                                | 49 ± 3                      | 74                                    | 7.13 ± 0.13                                | 51 ± 3                      | 112 ± 7                              |
| I352 <sup>7.35</sup> A | 10                                    | 7.99 ± 0.17                                | 59 ± 4                      | 77                                    | 7.12 ± 0.17                                | 59 ± 5                      | 134 ± 18                             |

894  
895  
896  
897  
898  
899  
900  
901  
902

<sup>a</sup>EC<sub>50</sub> values were determined after 1 h stimulation by increasing concentrations of NN9056 or CCK-8.

<sup>b</sup>All values are means ± S.E.M. from at least three independent experiments performed in triplicate.

<sup>c</sup>The span is defined as the window between the maximal NN9056/CCK-8 response (E<sub>max</sub>) and the vehicle (no ligand).

<sup>d</sup>Protein expression levels of CCK<sub>A</sub>R constructs at the cell surface were determined in parallel by flow cytometry with an anti-FLAG antibody and reported as percent compared to the WT CCK<sub>A</sub>R from at least three independent measurements performed in duplicate.

903  
904

**Extended Data Table 6 | Binding of gastrin-17 to wild-type (WT) and mutant CCK<sub>B</sub>Rs in competition with <sup>125</sup>I-CCK-8**

| Mutant                 | IC <sub>50</sub> (nM) | pIC <sub>50</sub> ± S.E.M. <sup>a</sup> | Span <sup>b</sup><br>(% of WT) | N <sup>c</sup> |
|------------------------|-----------------------|-----------------------------------------|--------------------------------|----------------|
| Wild-type              | 54.6                  | 7.26 ± 0.06                             | 100                            | 5              |
| T111 <sup>2.61</sup> A | 62.3                  | 7.20 ± 0.14                             | 71 ± 4                         | 4              |
| T111 <sup>2.61</sup> N | 32.2                  | 7.50 ± 0.11                             | 85 ± 4                         | 4              |
| S131 <sup>3.29</sup> A | 47.1                  | 7.33 ± 0.15                             | 86 ± 6                         | 4              |
| M134 <sup>3.32</sup> A | 78.0                  | 7.11 ± 0.14                             | 112 ± 7                        | 4              |
| Y189 <sup>4.60</sup> A | n.a. <sup>f</sup>     | n.a.                                    | n.a.                           | 4              |
| H207 <sup>ECL2</sup> A | n.a.                  | n.a.                                    | n.a.                           | 4              |
| S219 <sup>5.39</sup> H | 47.6                  | 7.32 ± 0.25                             | 52 ± 6                         | 4              |
| Y350 <sup>6.52</sup> A | 42.7                  | 7.37 ± 0.20                             | 75 ± 7                         | 4              |
| R356 <sup>6.58</sup> A | n.a.                  | n.a.                                    | n.a.                           | 4              |
| H364 <sup>7.27</sup> A | 40.0                  | 7.40 ± 0.22                             | 67 ± 7                         | 4              |
| L367 <sup>7.30</sup> A | n.a.                  | n.a.                                    | n.a.                           | 4              |
| S368 <sup>7.31</sup> A | 6.5                   | 8.19 ± 0.19                             | 56 ± 5                         | 3              |
| I372 <sup>7.35</sup> A | n.a.                  | n.a.                                    | n.a.                           | 4              |
| H376 <sup>7.39</sup> A | n.a.                  | n.a.                                    | n.a.                           | 5              |
| Y380 <sup>7.43</sup> A | n.a.                  | n.a.                                    | n.a.                           | 4              |

905  
906  
907  
908  
909  
910  
911  
912  
913

<sup>a</sup>Data shown are means ± S.E.M. from at least three independent experiments performed in triplicate. Source data are provided as a Source Data file.

<sup>b</sup>The span is defined as the window between the maximal <sup>125</sup>I-CCK-8 response (E<sub>max</sub>) and the vehicle (no ligand).

<sup>c</sup>Sample size; the number of independent experiments performed in triplicate.

<sup>f</sup>Cannot be calculated due to poor binding of corresponding mutant.
